# Supplementary material for: Antibodies specific to SARS-CoV-2 proteins N, S and E in COVID-19 patients in the normal population and in historical samples
Source: PubMed Central journal article supplement (PMC8742988; doi:10.1099/jgv.0.001692), 2021-11-24
Supplement: jgv-102-1692-s001.pdf [file jgv-102-1692-s001.pdf]

## Supplementary material

### Analysis of selected cases

**Case 1, pre-epidemic patients** (patients E181, E196, E198, E201, E222, E226, E227).

Sera collected between November 2019 and February 2020, i.e. shortly before the first officially confirmed SARS-CoV-2 case in Poland that was registered on March the 4<sup>th</sup>, were tested with the serological diagnostic test (anti-N IgG). In total, 45 serum samples were tested, but only one (E198) was found positive (data not shown). This result could suggest that COVID-19 cases occurred in Poland before the first officially confirmed case. The positive sample E198 and 7 more samples with relatively high reads in the diagnostics were selected for further investigation in this study. However, all anti-S1 IgG levels in these samples were found very low (see: Supplementary Table S1). Sample E198, and in addition samples E182 and E226, were tested by the cell-free inhibitory ELISA, but no virus-neutralizing activity was observed (Table S3). Thus, positive serological diagnostics for SARS-CoV-2 in serum E198 is rather a false-positive or cross-reaction, and it does not demonstrate pre-epidemic circulation of the virus in the population.

**Case 2, limited disease transmission in a household** (patients 395, 396, COV24, a family in one household).

A 47-year-old woman (patient COV24) developed COVID-19 with a range of symptoms including cough, breathing difficulties, smell and taste loss. SARS-CoV-2 infection was confirmed by RT-PCR testing, no hospitalization required (home isolation and treatment), serological testing when recovered (approx. 1 month from symptoms): positive. Serum demonstrated inhibitory activity against S-ACE2 binding.

Her 46-year-old husband (patient 396) had no symptoms from the respiratory tract and he was confirmed negative by double RT-PCR testing, he was however affected by acute gastric disorders, initially not considered to be linked to COVID-19. Serological testing when recovered: positive; serum demonstrated inhibitory activity against S-ACE2 binding.

Their 21-year-old daughter (patient 395), with no symptoms, confirmed negative by double RT-PCR testing, serological testing: negative. Serum activity against S-ACE2 binding – test inconclusive (tested twice).

In this family transmission from the wife to her husband seems evident, even though SARS-CoV-2 was not detected by his molecular diagnostics. He was affected by a rare type of symptoms and he developed anti-SARS-CoV-2 antibodies, as detected by serological diagnostic tests. SARS-CoV-2 infection in this patient was also revealed by detailed ELISA testing for anti-N, anti-S1, and anti-E antibodies. Particularly, this testing demonstrated that IgG specific to N, S1, and E protein reached 168.2, 450.1, 539.7 [EU], respectively, which is far above median reads in the group of healthy (negative) donors, and even in the group of COVID-confirmed patients (Table S2). Most interestingly, the 21-year-old daughter, though seemingly not infected and diagnosed as negative by both molecular and serological testing, developed very high levels of IgG specific to proteins S1 and E: 638.8 and >1000 [EU], respectively. On the other hand, however, virus neutralizing activity of the serum was

not confirmed due to inconclusive results (Table S3). These observations suggest that her exposure to the virus resulted in challenging the immune system and in the response, but she was also effectively protected from the disease by other elements of the immune system (no symptoms, negative molecular testing). Weak inhibitory action of induced antibodies may suggest that particularly other (than antibodies) types of immune responses, including cellular response, might play a major role in the protection. Also, non-inhibitory antibodies such as anti-E antibodies may cooperate with non-specific elements of the immune system, including the complement system or phagocytes, and boost their action against the virus.

### **Case 3, possible asymptomatic infection with immune response to S1 but not to N protein (patient 248 samples A, B, and C)**

A 49-year-old healthcare worker (male) exposed to SARS-CoV-2 in the working environment due to a burst of infections in the department. This patient was not affected by any symptoms around the exposure and testing, though he reported some flu-like infection in February (more than 2 months before). Five diagnostic RT-PCR tests within 6 weeks after the exposure were confirmed negative. The first sample for serological testing (A) was collected at the beginning of the infection burst in the department. In this sample N-specific IgM was detected by the diagnostic test, but IgG was not detected either in sample A, or in B (1 month after A) or in C (5 months after A). Indeed, detailed testing of anti-N IgG by normalized ELISA revealed no marked levels (14.0, 25.7, and 28.0 [EU] in samples A, B, and C, respectively), but anti-S1 IgG reached 972.7 [EU] in sample B, which is almost 3 times higher than the median in COVID-confirmed patients (Table S2). Later (sample C) anti-S1 IgG markedly decreased to 432.0 [EU] (56% of loss), being however still higher than the median in COVID-confirmed patients (Table S2). Serum activity against S-ACE2 binding test was inconclusive, i.e. neither positive nor negative (Table S3).

This case is similar to previously described patient 395 (see case 2) and it suggests again that exposure to the virus resulted in an efficient immune response that protected against the disease (no symptoms), but with immunological elements other than antibodies. Neither 'diagnostic' (anti-N) antibodies nor virus inhibitory antibodies were effectively induced, though an overall anti-S IgG rise was evident. This again suggests protective action of the cellular part of the immune system or an indirect inhibitory effect on the virus that can be exerted by non-neutralizing antibodies.

### **Case 4, repeated infection (patients COV19 and COV20).**

Two patients from one household (a husband and a wife) were infected with SARS-CoV-2 in April as confirmed with RT-PCR diagnostics, with a set of typical but rather mild symptoms. After this infection serological diagnostics was negative, and detailed serum testing for SARS-CoV-2 protein-specific antibodies by ELISA revealed relatively low levels of anti-N IgG. Anti-S IgG, however, seemed elevated, reaching 847.6 EU (COV19) and 452.8 EU (COV20). Testing for inhibitory activity against S-ACE2 binding gave inconclusive results. Half a year later (in early November) these two patients were again infected with SARS-CoV-2 as confirmed with RT-PCR; this time diagnostic anti-N testing confirmed N-specific IgG. Surprisingly, significant increase in anti-S1 IgG was not observed (up to 354.5 EU and 400.5 EU in COV19 and in COV20, respectively). However, their sera after the second infection revealed strong inhibitory activity against S-ACE2 binding (Table S3). This observation

advocates that overall levels of S1-specific IgG is not a fully valid predictor of virus-neutralizing potential of patients' sera.

The major question in this case is whether the first infection was not COVID-19, with only a false-positive RT-PCR testing result, or their immune responses during the first infection was impaired, or for the second time they were infected in a mutated and thus different strain of the virus. The latter scenario seems improbable since all testing (on both samples from spring and from autumn) was done with the same proteins and the same specificity was tested but with different results. Since inhibitory activity of sera collected in the spring was in fact not found negative (inconclusive results are considered 'too high for negative, too low for positive'), it seems probable that these particular patients responded to the virus, but they responded insufficiently. The second infection, however, induced a much stronger and effective immune response and virus-specific antibody production.

## Supplementary figures

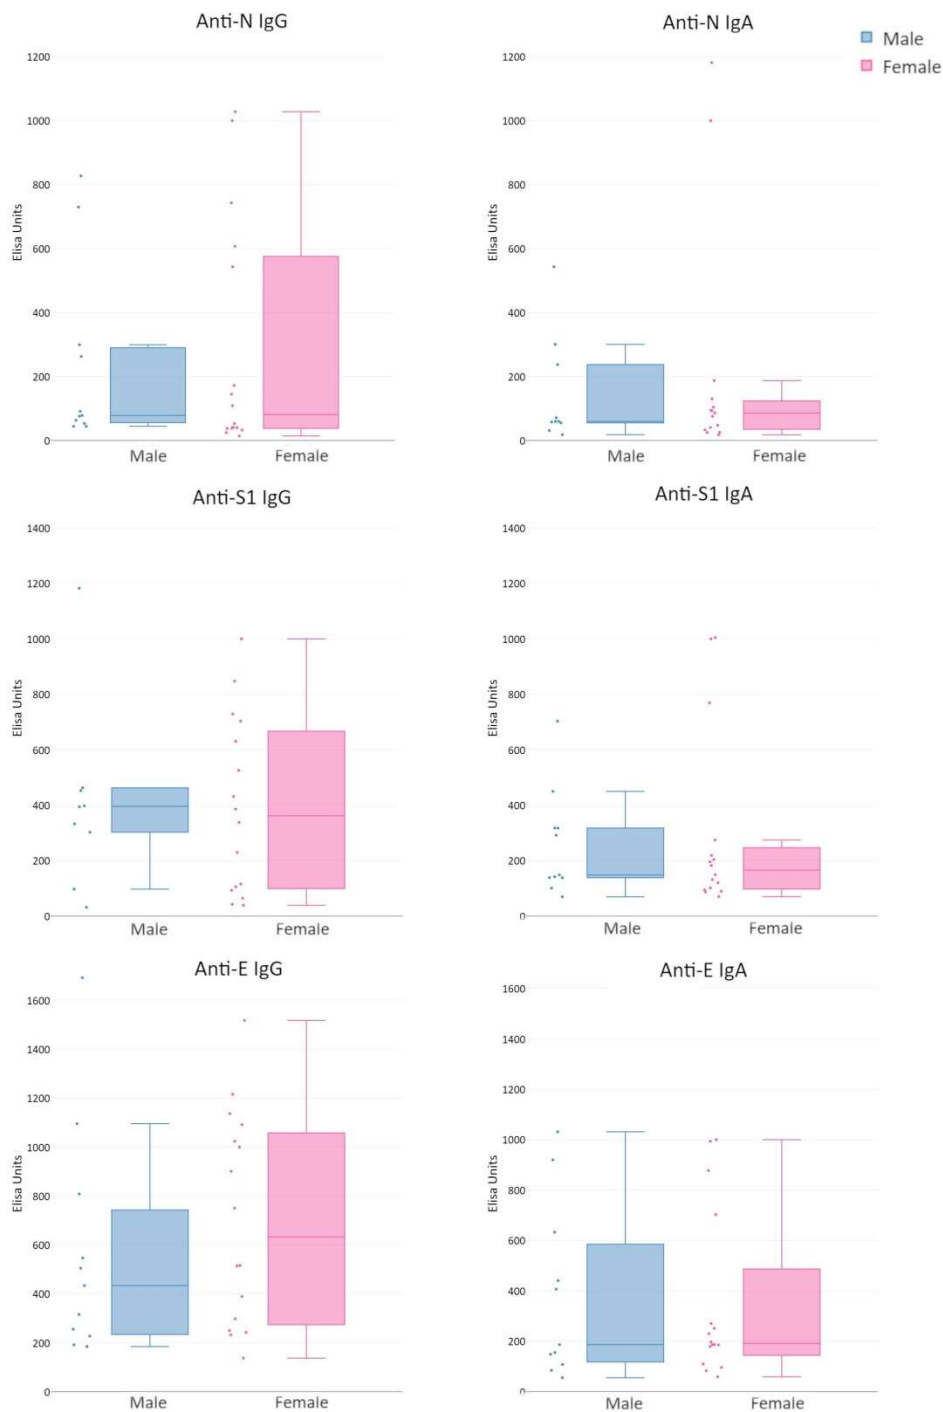

**Figure S1. SARS-CoV-2-specific antibody induction in male or female individuals infected with the virus.** Statistically significant differences were not found (data in Supplementary Table S1). Normalized ELISA units are presented, vertical lines in the boxes – median, boxes – values within 2<sup>nd</sup> and 3<sup>rd</sup> quartile, whiskers – SD, dots at the side of each box – real distribution of individual reads.

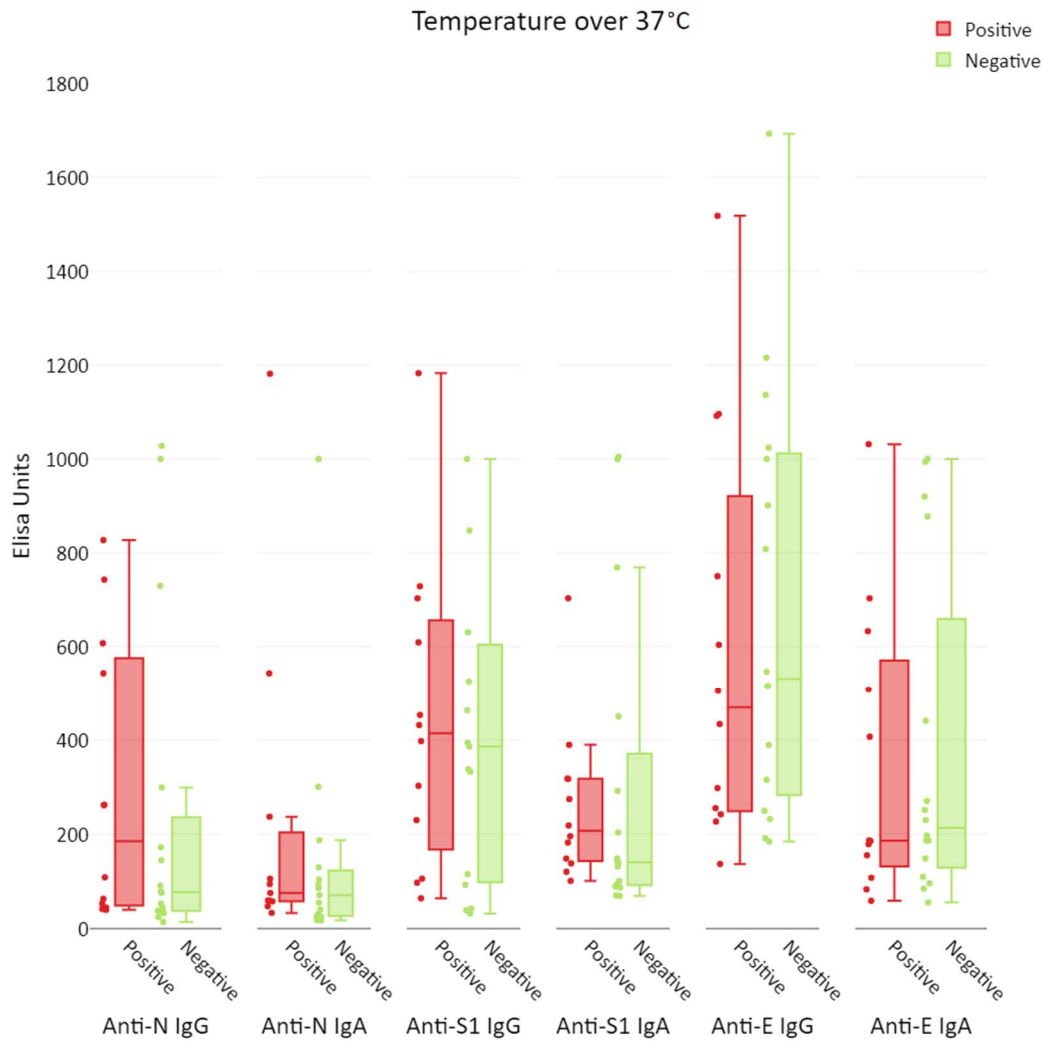

**Figure S2. Rise of body temperature during infection over 37°C as a predictor of SARS-CoV-2 structural protein-specific antibody induction.** Patients were grouped according to observed (positive) or not observed (negative) body temperature over 37°C. All samples were tested by ELISA on SARS-CoV-2 protein-covered plates, and normalized using reference serum (as described by Miura et al. [1,2]); normalized ELISA units are presented, vertical lines in the boxes – median, boxes – values within 2<sup>nd</sup> and 3<sup>rd</sup> quartile, whiskers – SD, dots at the side of each box – real distribution of individual reads.

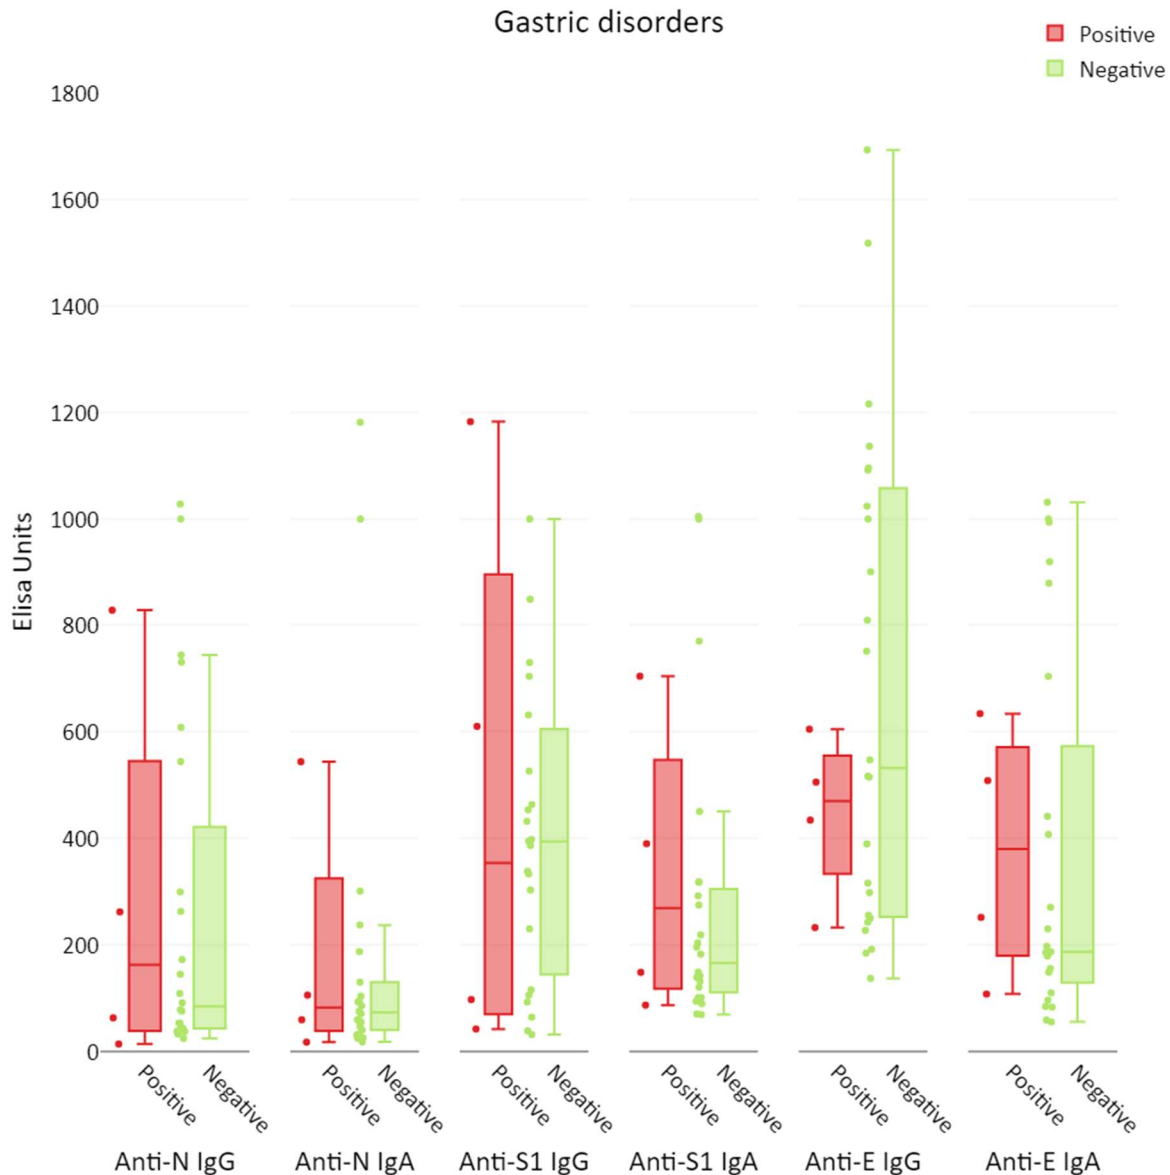

**Figure S3. Gastric disorders during infection as a poor predictor of SARS-CoV-2 structural protein-specific antibodies induction.** Samples from patients after infection were grouped according to observed (positive) or not observed (negative) breathing difficulties. All samples were tested by ELISA on SARS-CoV-2 protein-covered plates, and normalized using reference serum (as described by Miura et al. [1,2]); normalized ELISA units are presented, vertical lines in the boxes – median, boxes – values within 2<sup>nd</sup> and 3<sup>rd</sup> quartile, whiskers – SD, dots at the side of each box – real distribution of individual reads.

### Supplementary Tables

#### Table S1.

## Healthy

| Sample | Sample Date | Anty-N IgG | Anty-N IgA | Anty-S1 IgG | Anty-S1 IgA | Anty-E IgG | Anty-E IgA | Age     | Gender  | Workplace      | Temperature Over 38 | Temperature over 37 | Cough    | Breath difficulties | Runny nose | Smell and taste disorders | Status   | Date Status | Number of Symptoms | Sample order | Course of illness (COVID only) |
|--------|-------------|------------|------------|-------------|-------------|------------|------------|---------|---------|----------------|---------------------|---------------------|----------|---------------------|------------|---------------------------|----------|-------------|--------------------|--------------|--------------------------------|
| 179    | 24.04.2020  | 23,36      | 23,81      | 165,34      | 332,51      | 380,93     | 139,43     | 76      | Male    | Health Service | Negative            | Positive            | Positive | Negative            | Positive   | Negative                  | Healthy  | Epidemic    | 5                  | A            |                                |
| 180    | 24.04.2020  | 22,20      | 11,16      | 180,24      | 85,46       | 159,73     | 32,98      | No Data | No Data | No Data        | No Data             | No Data             | No Data  | No Data             | No Data    | No Data                   | Healthy  | Epidemic    | 0                  | A            |                                |
| 181    | 24.04.2020  | 21,03      | 16,87      | 265,64      | 113,95      | 388,67     | 89,46      | 35      | Female  | Health Service | Positive            | Positive            | Positive | Negative            | Negative   | Positive                  | Healthy  | Epidemic    | 6                  | A            |                                |
| 182    | 24.04.2020  | 29,21      | 201,88     | 117,18      | 162,08      | 136,50     | 202,40     | 29      | Male    | Health Service | Negative            | Negative            | Negative | Negative            | Negative   | Negative                  | Healthy  | Epidemic    | 0                  | A            |                                |
| 183    | 24.04.2020  | 19,86      | 26,79      | 349,80      | 117,88      | 152,23     | 112,44     | 47      | Female  | Health Service | Negative            | Negative            | Negative | Negative            | Negative   | Negative                  | Healthy  | Epidemic    | 0                  | A            |                                |
| 184    | 24.04.2020  | 32,71      | 23,07      | 704,82      | 98,72       | 410,45     | 153,92     | 24      | Male    | Health Service | Negative            | Positive            | Positive | Positive            | Positive   | Negative                  | Healthy  | Epidemic    | 5                  | A            |                                |
| 185    | 24.04.2020  | 78,27      | 15,63      | 66,04       | 94,30       |            | 66,97      | 41      | Female  | Health Service | Negative            | Negative            | Positive | Negative            | Positive   | Negative                  | Healthy  | Epidemic    | 2                  | A            |                                |
| 186    | 24.04.2020  | 25,70      | 21,33      | 338,63      | 115,42      | 689,25     | 155,92     | 31      | Female  | Health Service | Negative            | Negative            | Negative | Negative            | Negative   | Negative                  | Healthy  | Epidemic    | 0                  | A            |                                |
| 187    | 24.04.2020  | 25,70      | 18,35      | 506,21      | 201,87      | 157,79     | 164,42     | 33      | Female  | Health Service | Positive            | Positive            | Negative | Negative            | Positive   | Positive                  | Healthy  | Epidemic    | 5                  | A            |                                |
| 188    | 24.04.2020  | 17,52      | 365,33     | 226,42      | 273,58      | 158,76     | 250,37     | 53      | No Data | Health Service | Negative            | Positive            | Negative | Negative            | Negative   | Negative                  | Healthy  | Epidemic    | 1                  | A            |                                |
| 189    | 24.04.2020  | 24,53      | 59,28      | 163,60      | 235,27      | 334,95     | 272,86     | 36      | Male    | Health Service | Negative            | Negative            | Negative | Negative            | Negative   | Negative                  | Healthy  | Epidemic    | 0                  | A            |                                |
| 190    | 24.04.2020  | 17,52      | 21,58      | 223,19      | 303,14      | 77,44      | 340,33     | 37      | Male    | Army           | Negative            | Negative            | Negative | Negative            | Negative   | Negative                  | Healthy  | Epidemic    | 0                  | A            |                                |
| 191    | 24.04.2020  | 36,21      | 29,02      | 65,04       | 132,61      | 193,37     | 253,37     | No Data | No Data | No Data        | No Data             | No Data             | No Data  | No Data             | No Data    | No Data                   | Healthy  | Epidemic    | 0                  | A            |                                |
| 192    | 24.04.2020  | 23,36      | 17,36      | 302,38      | 87,92       | 464,42     | 58,97      | 52      | Female  | Health Service | Negative            | Positive            | Negative | Negative            | Positive   | Positive                  | Healthy  | Epidemic    | 4                  | A            |                                |
| 193    | 24.04.2020  | 24,53      | 16,87      | 110,97      | 84,48       | 308,57     | 87,46      | 41      | No Data | No Data        | Negative            | Negative            | Negative | Negative            | Negative   | Negative                  | Healthy  | Epidemic    | 0                  | A            |                                |
| 194    | 24.04.2020  | 30,37      | 17,61      | 578,95      | 120,33      | 804,45     | 88,46      | 49      | Female  | Health Service | Negative            | Negative            | Negative | Negative            | Negative   | Negative                  | Healthy  | Epidemic    | 0                  | A            |                                |
| 195    | 24.04.2020  | 22,20      | 25,79      | 368,17      | 169,94      | 721,44     | 178,41     | 34      | Male    | Health Service | Positive            | Positive            | Positive | Negative            | Positive   | Negative                  | Healthy  | Epidemic    | 5                  | A            |                                |
| 196    | 24.04.2020  | 16,36      | 667,41     | 190,67      | 96,27       | 69,70      | 296,85     | 29      | Female  | Health Service | Negative            | Negative            | Negative | Negative            | Negative   | Negative                  | Healthy  | Epidemic    | 0                  | A            |                                |
| 197    | 24.04.2020  | 19,86      | 22,57      | 358,74      | 117,88      | 182,72     | 86,46      | 23      | Female  | Office         | Negative            | Positive            | Negative | Negative            | Positive   | Negative                  | Healthy  | Epidemic    | 4                  | A            |                                |
| 198    | 24.04.2020  | 25,70      | 20,34      | 639,28      | 138,51      | 416,02     | 175,91     | 47      | Female  | Office         | Negative            | Positive            | Positive | Negative            | Positive   | Negative                  | Healthy  | Epidemic    | 4                  | A            |                                |
| 199    | 24.04.2020  | 25,70      | 57,79      | 276,07      | 130,65      | 180,78     | 103,45     | 40      | Female  | Researcher     | Negative            | Negative            | Negative | Negative            | Positive   | Negative                  | Healthy  | Epidemic    | 2                  | A            |                                |
| 199B   | 09.10.2020  | 28,04      | 48,61      | 404,17      | 71,71       | 224,59     | 79,96      | 40      | Female  | Researcher     | Negative            | Negative            | Negative | Negative            | Positive   | Negative                  | Healthy  | Epidemic    | 2                  | B            |                                |
| 200    | 24.04.2020  | 19,86      | 24,80      | 113,70      | 204,32      | 85,19      | 387,31     | No Data | No Data | No Data        | No Data             | No Data             | No Data  | No Data             | No Data    | Healthy                   | Epidemic | 0           | A                  |              |                                |
| 201    | 24.04.2020  | 19,86      | 10,66      | 228,15      | 71,71       | 121,97     | 78,96      | 42      | Female  | Health Service | Negative            | Negative            | Negative | Negative            | Negative   | Negative                  | Healthy  | Epidemic    | 0                  | A            |                                |
| 202    | 24.04.2020  | 26,87      | 22,32      | 530,29      | 115,42      | 131,41     | 125,44     | 37      | No Data | No Data        | Negative            | Negative            | Negative | Negative            | Negative   | Negative                  | Healthy  | Epidemic    | 0                  | A            |                                |
| 203    | 28.04.2020  | 18,69      | 14,14      | 319,51      | 66,80       | 128,03     | 61,97      | No Data | Female  | Health Service | Negative            | Negative            | Negative | Negative            | Negative   | Negative                  | Healthy  | Epidemic    | 0                  | A            |                                |
| 204    | 28.04.2020  | 22,20      | 33,48      | 62,86       | 144,40      | 321,88     | 216,89     | 38      | Female  | Health Service | Negative            | Positive            | Negative | Negative            | Negative   | Negative                  | Healthy  | Epidemic    | 3                  | A            |                                |
| 205    | 28.04.2020  | 19,19      | 33,98      | 134,06      | 135,25      | 74,54      | 261,87     | 45      | Female  | Health Service | Negative            | Negative            | Negative | Negative            | Negative   | Negative                  | Healthy  | Epidemic    | 2                  | A            |                                |
| 206    | 28.04.2020  | 30,37      | 74,40      | 323,73      | 427,80      |            | 423,79     | 67      | Female  | No Data        | Negative            | Negative            | Negative | Negative            | Negative   | Negative                  | Healthy  | Epidemic    | 0                  | A            |                                |
| 207    | 28.04.2020  | 23,36      | 37,95      | 43,20       | 102,65      | 321,88     | 152,42     | 56      | Female  | Health Service | Negative            | Negative            | Negative | Negative            | Negative   | Negative                  | Healthy  | Epidemic    | 0                  | A            |                                |
| 208    | 28.04.2020  | 42,06      | 49,85      | 43,20       | 565,32      | 366,41     | 77,96      | 35      | Female  | Health Service | Negative            | Negative            | Negative | Negative            | Negative   | Negative                  | Healthy  | Epidemic    | 0                  | A            |                                |
| 209    | 28.04.2020  | 21,03      | 82,34      | 61,57       | 210,22      | 1275,90    | 219,39     | 57      | No Data | Health Service | Negative            | Negative            | Negative | Negative            | Negative   | Negative                  | Healthy  | Epidemic    | 0                  | A            |                                |
| 210    | 28.04.2020  | 16,36      | 53,32      | 50,15       | 176,33      | 223,14     | 66,47      | 46      | Female  | Health Service | Negative            | Positive            | Positive | Negative            | Negative   | Negative                  | Healthy  | Epidemic    | 4                  | A            |                                |
| 211    | 28.04.2020  | 31,54      | 106,65     | 51,14       | 276,77      | 294,77     | 472,76     | 48      | Female  | Health Service | Negative            | Negative            | Negative | Negative            | Negative   | Negative                  | Healthy  | Epidemic    | 0                  | A            |                                |
| 212    | 28.04.2020  | 29,21      | 47,37      | 69,02       | 468,57      | 843,66     | 109,95     | 72      | Female  | Health Service | Negative            | Negative            | Negative | Negative            | Negative   | Negative                  | Healthy  | Epidemic    | 0                  | A            |                                |
| 213    | 28.04.2020  | 21,03      | 24,80      | 47,67       | 43,47       | 317,04     | 26,99      | No Data | No Data | No Data        | No Data             | No Data             | No Data  | No Data             | No Data    | Healthy                   | Epidemic | 0           | A                  |              |                                |
| 214    | 28.04.2020  | 28,04      | 122,27     | 51,14       | 284,63      | 578,41     | 514,24     | 51      | Female  | Airport        | Negative            | Negative            | Positive | Negative            | Negative   | Negative                  | Healthy  | Epidemic    | 1                  | A            |                                |
| 215    | 28.04.2020  | 16,36      | 49,60      | 52,63       | 105,35      | 444,82     | 85,96      | 34      | Male    | Health Service | Negative            | Negative            | Negative | Negative            | Negative   | Negative                  | Healthy  | Epidemic    | 0                  | A            |                                |
| 216    | 29.04.2020  | 21,03      | 49,60      | 45,18       | 115,91      | 333,01     | 147,43     | No Data | Female  | Health Service | Negative            | Negative            | Positive | Negative            | Positive   | Negative                  | Healthy  | Epidemic    | 2                  | A            |                                |
| 217    | 29.04.2020  | 11,68      | 15,38      | 48,66       | 70,48       | 244,92     | 38,98      | No Data | No Data | No Data        | No Data             | No Data             | No Data  | No Data             | No Data    | Healthy                   | Epidemic | 0           | A                  |              |                                |
| 218    | 29.04.2020  | 18,69      | 33,48      | 62,86       | 144,40      | 321,88     | 216,89     | 38      | Female  | Health Service | Negative            | Positive            | Negative | Positive            | Positive   | Negative                  | Healthy  | Epidemic    | 3                  | A            |                                |
| 219    | 29.04.2020  | 15,19      | 49,36      | 51,64       | 100,20      | 260,89     | 123,94     | 38      | Female  | Health Service | Negative            | Negative            | Negative | Negative            | Negative   | Negative                  | Healthy  | Epidemic    | 0                  | A            |                                |
| 220    | 29.04.2020  | 36,21      | 41,91      | 62,56       | 46,91       | 395,45     | 21,99      | No Data | Female  | No Data        | Negative            | Negative            | Negative | Negative            | Negative   | Negative                  | Healthy  | Epidemic    | 0                  | A            |                                |
| 221    | 29.04.2020  | 21,03      | 85,57      | 43,69       | 137,03      | 545,98     | 313,84     | 60      | Male    | Health Service | Negative            | Negative            | Negative | Negative            | Positive   | Negative                  | Healthy  | Epidemic    | 1                  | A            |                                |
| 222    | 29.04.2020  | 24,53      | 81,35      | 71,50       | 131,63      |            | 124,44     | 46      | Female  | Health Service | Negative            | Negative            | Negative | Negative            | Negative   | Negative                  | Healthy  | Epidemic    | 0                  | A            |                                |
| 223    | 29.04.2020  | 29,21      | 51,34      | 61,07       | 142,19      | 905,13     | 229,39     | No Data | Female  | Health Service | Negative            | Negative            | Negative | Negative            | Negative   | Negative                  | Healthy  | Epidemic    | 0                  | A            |                                |
| 224    | 29.04.2020  | 30,37      | 35,96      | 64,55       | 89,64       | 562,92     | 76,96      | No Data | No Data | No Data        | No Data             | No Data             | No Data  | No Data             | No Data    | Healthy                   | Epidemic | 0           | A                  |              |                                |
| 225    | 29.04.2020  | 17,52      | 38,94      | 52,14       | 204,81      | 620,52     | 155,42     | No Data | No Data | No Data        | No Data             | No Data             | No Data  | No Data             | No Data    | Healthy                   | Epidemic | 0           | A                  |              |                                |
| 226    | 29.04.2020  | 30,37      | 41,17      | 67,53       | 102,65      | 1241,05    | 72,96      | 64      | Female  | Health Service | Negative            | Negative            | Negative | Negative            | Negative   | Negative                  | Healthy  | Epidemic    | 0                  | A            |                                |
| 227    | 29.04.2020  | 29,21      | 40,67      | 55,11       | 113,21      | 331,56     | 206,90     | 55      | Male    | Health Service | Negative            | Negative            | Negative | Negative            | Negative   | Negative                  | Healthy  | Epidemic    | 0                  | A            |                                |
| 228    | 30.04.2020  | 51,40      | 43,15      | 53,62       | 151,28      | 590,51     | 260,87     | 24      | Female  | Health Service | Negative            | Negative            | Negative | Negative            | Negative   | Negative                  | Healthy  | Epidemic    | 1                  | A            |                                |
| 229    | 30.04.2020  | 22,20      | 67,96      | 60,58       | 165,77      | 542,59     | 232,88     | 60      | Female  | Health Service | Negative            | Negative            | Negative | Negative            | Negative   | Negative                  | Healthy  | Epidemic    | 0                  | A            |                                |
| 230    | 30.04.2020  | 15,19      | 23,31      | 33,27       | 47,15       | 143,27     | 44,98      | 23      | Female  | Health Service | Negative            | Negative            | Negative | Negative            | Negative   | Negative                  | Healthy  | Epidemic    | 0                  | A            |                                |
| 231    | 30.04.2020  | 12,85      | 42,16      | 42,20       | 124,02      | 621,97     | 125,94     | 44      | Female  | No Data        | Positive            | Positive            | Positive | Negative            | Positive   | Negative                  | Healthy  | Epidemic    | 5                  | A            |                                |
| 232    | 05.05.2020  | 21,03      | 42,41      | 51,64       | 71,71       | 388,67     | 78,96      | 52      | Male    | Health Service | Negative            | Negative            | Negative | Negative            | Negative   | Negative                  | Healthy  | Epidemic    | 0                  | A            |                                |
| 233    | 05.05.2020  | 22,20      | 58,53      | 53,13       | 127,95      | 407,55     | 149,93     | 58      | Female  | Health Service | Negative            | Negative            | Negative | Negative            | Negative   | Negative                  | Healthy  | Epidemic    | 0                  | A            |                                |
| 234    | 08.05.2020  | 25,70      | 89,29      | 171,30      | 117,06      | 351,65     | 140,93     | 34      | Male    | Health Service | Negative            | Negative            | Negative | Negative            | Negative   | Negative                  | Healthy  | Epidemic    | 0                  | A            |                                |
| 235    | 07.05.2020  | 14,02      | 13,64      | 118,67      | 110,02      | 237,66     | 110,44     | 32      | Male    | Office         | Negative            | Negative            | Negative | Negative            | Negative   | Negative                  | Healthy  | Epidemic    | 0                  | A            |                                |
| 236    | 07.05.2020  | 23,36      | 14,38      | 168,82      | 114,93      | 553,73     | 102,45     | 31      | Female  | Office         | Negative            | Negative            | Negative | Negative            | Negative   | Negative                  | Healthy  | Epidemic    | 1                  | A            |                                |
| 237    | 07.05.2020  | 22,20      | 23,81      | 246,28      | 127,70      | 339,30     | 117,44     | 30      | Male    | Office         | Negative            | Negative            | Negative | Negative            | Negative   | Negative                  | Healthy  | Epidemic    | 0                  | A            |                                |
| 238    | 07.05.2020  | 18,69      | 8,68       | 539,72      | 93,32       | 410,94     | 78,96      | 67      | Female  | Pensioner      | Negative            | Positive            | Positive | Positive            | Negative   | Negative                  | Healthy  | Epidemic    | 4                  | A            |                                |
| 239    | 07.05.2020  | 46,73      | 210,32     | 701,09      | 133,10      | 785,58     | 111,44     | 26      | Female  | Researcher     | Positive            | Positive            | Positive | Positive            | Positive   | Negative                  | Healthy  | Epidemic    | 6                  | A            |                                |
| 240    | 07.05.2020  | 22,20      | 42,66      | 3,97        | 407,17      | 817,52     | 445,78     | 37      | Female  | Researcher     | Positive            | Positive            | Negative | Negative            | Negative   | Negative                  | Healthy  | Epidemic    | 3                  | A            |                                |
| 241    | 07.05.2020  | 14,02      | 14,88      | 98,31       | 71,71       | 532,43     | 66,47      | 29      | Female  | Researcher     | Negative            | Negative            | Negative | Negative            | Positive   | Negative                  | Healthy  | Epidemic    | 2                  | A            |                                |
| 242    | 07.05.2020  | 28,04      | 25,30      | 314,80      | 185,17      | 611,33     | 235,38     | 30      | Female  | Researcher     | Negative            | Negative            | Positive | Negative            | Positive   | Negative                  | Healthy  | Epidemic    | 2                  | A            |                                |
| 243    | 07.05.2020  | 18,69      | 9,92       | 157,40      | 72,69       | 515,97     | 74,96      | 26      | Male    | Researcher     | Positive            | Positive            | Positive | Positive            | Positive   | Negative                  | Healthy  | Epidemic    | 5                  | A            |                                |
| 243B   | 13.10.2020  | 28,04      | 13,89      | 313,80      | 40,28       | 162,63     | 36,98      | 26      | Male    | Researcher     | Positive            | Positive            | Negative | Positive            | Positive   | Negative                  | Healthy  | Epidemic    | 5                  | B            |                                |
| 244    | 07.05.2020  | 19,86      | 53,32      | 498,76      | 108,06      | 589,55     | 39,36      | 29      | Male    | Office         | Negative            | Negative            | Negative | Negative            | Negative   | Negative                  | Healthy  | Epidemic    | 0                  | A            |                                |
| 245    | 07.05.2020  | 14,02      | 45,36      | 58,59       | 244,11      | 395,45     | 309,35     | 31      | Female  | Researcher     | Negative            | Negative            | Negative | Negative            | Negative   | Negative                  | Healthy  | Epidemic    | 3                  | A            |                                |
| 246    | 07.05.2020  | 9,33       | 23,56      | 236,35      | 189,59      | 376,57     | 500,75     |         |         |                |                     |                     |          |                     |            |                           |          |             |                    |              |                                |

|      |            |       |        |         |         |         |         |         |                    |                              |          |          |          |          |          |          |          |          |   |   |
|------|------------|-------|--------|---------|---------|---------|---------|---------|--------------------|------------------------------|----------|----------|----------|----------|----------|----------|----------|----------|---|---|
| 259  | 11.05.2020 | 32,71 | 42,16  | 560,08  | 186,15  | 768,64  | 418,29  | 50      | Male               | Builder                      | Positive | Positive | Positive | Positive | Negative | Negative | Healthy  | Epidemic | 5 | A |
| 260  | 11.05.2020 | 17,52 | 22,57  | 240,32  | 93,81   | 334,95  | 103,95  | 43      | Female             | Sales Manager                | Positive | Positive | Negative | Negative | Positive | Positive | Healthy  | Epidemic | 5 | A |
| 261  | 11.05.2020 | 47,90 | 24,55  | 857,00  | 269,65  | 308,33  | 354,82  | 58      | Female             | Health Service               | Negative | Positive | Negative | Negative | Positive | Positive | Healthy  | Epidemic | 6 | A |
| 262  | 11.05.2020 | 15,19 | 20,34  | 125,12  | 177,31  | 316,07  | 707,15  | 26      | Female             | Office                       | Negative | Positive | Positive | Negative | Positive | Negative | Healthy  | Epidemic | 4 | A |
| 263  | 11.05.2020 | 29,21 | 48,86  | 637,04  | 278,24  | 573,57  | 735,13  | 32      | Male               | Office                       | Positive | Positive | Positive | Negative | Positive | Negative | Healthy  | Epidemic | 4 | A |
| 264  | 11.05.2020 | 85,28 | 40,18  | 143,00  | 199,90  | 949,66  | 376,81  | 36      | Male               | No Data                      | Negative | Negative | Negative | Negative | Negative | Negative | Healthy  | Epidemic | 0 | A |
| 265  | 11.05.2020 | 26,87 | 20,09  | 207,05  | 67,78   | 818,73  | 93,95   | 44      | Female             | Researcher                   | Positive | Positive | Positive | Negative | Positive | Negative | Healthy  | Epidemic | 4 | A |
| 2658 | 08.10.2020 | 28,04 | 34,72  | 519,36  | 77,60   | 538,24  | 97,95   | 44      | Female             | Researcher                   | Positive | Positive | Positive | Negative | Positive | Negative | Healthy  | Epidemic | 4 | B |
| 266  | 11.05.2020 | 26,87 | 49,60  | 391,26  | 385,07  | 604,55  | 763,62  | 64      | Female             | Pensioner                    | Negative | Negative | Negative | Negative | Negative | Negative | Healthy  | Epidemic | 0 | A |
| 267  | 11.05.2020 | 79,44 | 71,68  | 123,14  | 206,78  | 887,22  | 123,14  | 27      | Male               | Unemployed                   | Negative | Negative | Negative | Negative | Negative | Negative | Healthy  | Epidemic | 0 | A |
| 268  | 11.05.2020 | 26,87 | 29,27  | 99,30   | 119,11  | 529,04  | 280,36  | 60      | Female             | Office                       | Negative | Negative | Positive | Negative | Negative | Negative | Healthy  | Epidemic | 2 | A |
| 269  | 13.05.2020 | 75,93 | 186,26 | 153,92  | 164,29  | 463,21  | 399,80  | 50      | Male               | Education                    | Negative | Negative | Negative | Negative | Negative | Negative | Healthy  | Epidemic | 0 | A |
| 270  | 13.05.2020 | 12,85 | 16,87  | 73,98   | 80,30   | 485,16  | 131,43  | 59      | Male               | Pensioner                    | Negative | Negative | Positive | Positive | Positive | Negative | Healthy  | Epidemic | 3 | A |
| 271  | 13.05.2020 | 22,20 | 14,38  | 182,22  | 36,35   | 440,95  | 75,46   | 19      | Male               | Student                      | Negative | Positive | Positive | Negative | Positive | Negative | Healthy  | Epidemic | 4 | A |
| 272  | 08.05.2020 | 21,03 | 65,23  | 201,09  | 157,42  | 587,37  | 287,86  | 29      | Female             | Police                       | Negative | Negative | Negative | Negative | Negative | Negative | Healthy  | Epidemic | 0 | A |
| 273  | 13.05.2020 | 15,19 | 26,29  | 95,83   | 113,21  | 232,58  | 133,93  | 32      | Male               | Police                       | Negative | Negative | Negative | Negative | Positive | Negative | Healthy  | Epidemic | 1 | A |
| 274  | 13.05.2020 | 15,19 | 19,59  | 84,91   | 41,99   | 282,43  | 94,45   | 51      | Male               | Office                       | Positive | Positive | Positive | Positive | Negative | Negative | Healthy  | Epidemic | 3 | A |
| 275  | 13.05.2020 | 25,70 | 24,80  | 300,89  | 104,13  | 623,91  | 207,40  | 28      | Female             | Education                    | Negative | Negative | Positive | Negative | Positive | Negative | Healthy  | Epidemic | 4 | A |
| 276  | 13.05.2020 | 21,03 | 40,43  | 129,59  | 94,06   | 350,92  | 313,84  | 51      | Male               | Medical Sales representative | Positive | Positive | Negative | Positive | Positive | Negative | Healthy  | Epidemic | 6 | A |
| 277  | 19.05.2020 | 25,70 | 30,01  | 107,25  | 78,34   | 199,42  | 128,94  | 31      | Male               | Health Service               | Negative | Positive | Positive | Positive | Positive | Negative | Healthy  | Epidemic | 6 | A |
| 278  | 09.05.2020 | 19,86 | 34,72  | 145,98  | 195,48  | 583,25  | 234,88  | 54      | Male               | Office                       | Positive | Positive | Positive | Positive | Positive | Negative | Healthy  | Epidemic | 6 | A |
| 279  | 09.05.2020 | 14,02 | 25,05  | 115,19  | 74,90   | 613,59  | 137,43  | 49      | Female             | Health Service               | Negative | Negative | Negative | Negative | Negative | Negative | Healthy  | Epidemic | 0 | A |
| 280  | 19.05.2020 | 38,55 | 43,40  | 387,79  | 757,37  | 1417,23 | 1402,80 | No Data | Male               | Health Service               | Negative | Negative | Negative | Negative | Negative | Negative | Healthy  | Epidemic | 0 | A |
| 281  | 19.05.2020 | 23,36 | 33,73  | 214,50  | 23,36   | 1095,84 | 304,35  | 32      | Male               | Health Service               | Negative | Negative | Negative | Negative | Negative | Negative | Healthy  | Epidemic | 0 | A |
| 282  | 11.05.2020 | 38,55 | 60,76  | 152,93  | 179,52  | 569,70  | 464,27  | No Data | No Data            | No Data                      | No Data  | No Data  | No Data  | No Data  | No Data  | Healthy  | Epidemic | 0        | A |   |
| 283  | 11.05.2020 | 23,36 | 106,15 | 177,76  | 120,09  | 347,21  | 780,61  | No Data | No Data            | No Data                      | No Data  | No Data  | No Data  | No Data  | No Data  | Healthy  | Epidemic | 0        | A |   |
| 284  | 12.05.2020 | 16,36 | 36,71  | 124,13  | 106,34  | 381,41  | 310,84  | 33      | Male               | Office                       | Negative | Negative | Negative | Negative | Negative | Negative | Healthy  | Epidemic | 0 | A |
| 285  | 12.05.2020 | 38,55 | 26,54  | 407,65  | 115,18  | 731,36  | 348,33  | 46      | Female             | Lecturer                     | Positive | Positive | Positive | Negative | Negative | Negative | Healthy  | Epidemic | 4 | A |
| 286  | 13.05.2020 | 25,70 | 29,76  | 443,40  | 91,36   | 362,86  | 251,37  | 35      | Female             | Office                       | Negative | Negative | Negative | Negative | Negative | Negative | Healthy  | Epidemic | 0 | A |
| 287  | 14.05.2020 | 30,37 | 31,50  | 186,69  | 117,39  | 879,48  | 312,34  | 45      | Female             | Office                       | Negative | Positive | Negative | Negative | Positive | Negative | Healthy  | Epidemic | 2 | A |
| 288  | 14.05.2020 | 35,05 | 60,76  | 289,97  | 228,39  | 747,82  | 1079,46 | 45      | Male               | Production hall              | Negative | Negative | Negative | Negative | Negative | Negative | Healthy  | Epidemic | 0 | A |
| 289  | 14.05.2020 | 11,68 | 44,64  | 52,63   | 62,62   | 278,48  | 197,90  | 45      | Female             | Health Service               | Negative | Positive | Positive | Negative | Positive | Negative | Healthy  | Epidemic | 5 | A |
| 290  | 14.05.2020 | 51,40 | 29,27  | 347,07  | 101,42  | 816,88  | 267,37  | 44      | Male               | Office                       | Negative | Negative | Negative | Negative | Negative | Negative | Healthy  | Epidemic | 0 | A |
| 291  | 14.05.2020 | 54,91 | 108,13 | 290,47  | 292,73  | 580,11  | 489,26  | 44      | Female             | Office                       | Negative | Positive | Negative | Negative | Positive | Negative | Healthy  | Epidemic | 3 | A |
| 292  | 14.05.2020 | 26,87 | 24,80  | 414,60  | 136,54  | 984,03  | 98,95   | 22      | Female             | Student                      | Negative | Negative | Negative | Negative | Negative | Negative | Healthy  | Epidemic | 0 | A |
| 293  | 14.05.2020 | 32,71 | 32,74  | 492,80  | 140,96  | 169,41  | 121,94  | 61      | Female             | Pensioner                    | Negative | Negative | Positive | Negative | Negative | Negative | Healthy  | Epidemic | 2 | A |
| 294  | 14.05.2020 | 31,54 | 65,97  | 487,99  | 253,44  | 487,09  | 376,36  | 32      | Female             | Office                       | Negative | Negative | Negative | Negative | Negative | Negative | Healthy  | Epidemic | 0 | A |
| 295  | 30.04.2020 | 23,36 | 38,19  | 444,39  | 122,79  | 832,77  | 131,43  | 65      | Male               | Health Service               | Negative | Negative | Negative | Negative | Negative | Negative | Healthy  | Epidemic | 0 | A |
| 296  | 14.05.2020 | 25,70 | 61,01  | 283,27  | 214,15  | 928,85  | 440,28  | No Data | No Data            | No Data                      | No Data  | No Data  | No Data  | No Data  | No Data  | Healthy  | Epidemic | 0        | A |   |
| 297  | 14.05.2020 | 39,72 | 81,85  | 427,01  | 329,57  | 453,27  | 53      | Female  | Office             | Negative                     | Negative | Negative | Negative | Negative | Negative | Healthy  | Epidemic | 0        | A |   |
| 298  | 14.05.2020 | 59,58 | 69,44  | 227,90  | 109,53  | 296,47  | 117,94  | 29      | Female             | Office                       | Negative | Positive | Positive | Negative | Positive | Negative | Healthy  | Epidemic | 5 | A |
| 299  | 15.05.2020 | 21,03 | 63,00  | 197,86  | 248,04  | 383,11  | 293,35  | 49      | Female             | Health Service               | Negative | Negative | Negative | Negative | Positive | Negative | Healthy  | Epidemic | 1 | A |
| 300  | 15.05.2020 | 40,89 | 44,15  | 364,45  | 230,84  | 437,56  | 329,84  | 42      | Male               | Office                       | Negative | Negative | Negative | Negative | Negative | Negative | Healthy  | Epidemic | 1 | A |
| 301  | 15.05.2020 | 49,07 | 115,58 | 759,43  | 648,82  | 156,82  | 809,10  | 48      | Male               | Office                       | Negative | Negative | Negative | Negative | Negative | Negative | Healthy  | Epidemic | 1 | A |
| 302  | 15.05.2020 | 30,37 | 55,56  | 454,07  | 218,07  | 655,13  | 379,31  | 40      | Female             | Artist                       | Negative | Positive | Negative | Negative | Negative | Negative | Healthy  | Epidemic | 3 | A |
| 303  | 15.05.2020 | 33,88 | 32,24  | 334,66  | 101,18  | 189,91  | 36      | Female  | Office             | Negative                     | Positive | Positive | Positive | Negative | Negative | Healthy  | Epidemic | 5        | A |   |
| 304  | 15.05.2020 | 24,53 | 44,15  | 337,39  | 195,48  | 433,20  | 257,37  | 38      | Male               | Office                       | Negative | Negative | Positive | Negative | Positive | Negative | Healthy  | Epidemic | 4 | A |
| 305  | 15.05.2020 | 23,36 | 39,19  | 298,91  | 140,47  | 353,58  | 221,89  | 46      | Male               | Public Transport Driver      | Negative | Negative | Negative | Negative | Negative | Negative | Healthy  | Epidemic | 0 | A |
| 306  | 15.05.2020 | 18,69 | 35,22  | 238,08  | 174,36  | 228,70  | 244,38  | 39      | Female             | Office                       | Negative | Negative | Positive | Negative | Negative | Negative | Healthy  | Epidemic | 2 | A |
| 307  | 15.05.2020 | 16,36 | 61,01  | 289,47  | 250,00  | 179,82  | 499,25  | 26      | Female             | Shop                         | Negative | Positive | Negative | Negative | Negative | Negative | Healthy  | Epidemic | 3 | A |
| 308  | 15.05.2020 | 30,37 | 148,31 | 222,94  | 435,66  | 906,55  | 43      | Male    | Shop               | Negative                     | Negative | Negative | Negative | Negative | Negative | Healthy  | Epidemic | 0        | A |   |
| 309  | 15.05.2020 | 63,08 | 107,64 | 299,61  | 299,61  | 1240,88 | 46      | Male    | Technical employee | Negative                     | Positive | Positive | Negative | Positive | Negative | Healthy  | Epidemic | 3        | A |   |
| 310  | 15.05.2020 | 33,88 | 41,17  | 249,01  | 157,17  | 1408,52 | 212,89  | 37      | Female             | Office                       | Negative | Negative | Negative | Negative | Negative | Negative | Healthy  | Epidemic | 0 | A |
| 311  | 15.05.2020 | 9,35  | 58,53  | 206,06  | 204,32  | 146,18  | 200,40  | 41      | Female             | Shop                         | Negative | Negative | Negative | Negative | Negative | Negative | Healthy  | Epidemic | 0 | A |
| 312  | 15.05.2020 | 39,72 | 112,10 | 481,88  | 261,79  | 109,39  | 473,26  | 36      | Female             | Shop                         | Negative | Positive | Negative | Negative | Positive | Negative | Healthy  | Epidemic | 5 | A |
| 313  | 15.05.2020 | 39,72 | 47,62  | 570,26  | 214,64  | 123,91  | 224,39  | 42      | Female             | Office                       | Negative | Negative | Positive | Negative | Negative | Negative | Healthy  | Epidemic | 3 | A |
| 314  | 15.05.2020 | 16,36 | 78,37  | 349,30  | 352,65  | 126,33  | 353,32  | 45      | Female             | Office                       | Negative | Positive | Positive | Negative | Positive | Negative | Healthy  | Epidemic | 4 | A |
| 315  | 15.05.2020 | 18,69 | 61,01  | 284,01  | 129,67  | 422,31  | 271,86  | 28      | Male               | Production hall              | Negative | Positive | Negative | Negative | Positive | Negative | Healthy  | Epidemic | 3 | A |
| 316  | 15.05.2020 | 31,54 | 43,15  | 176,02  | 331,53  | 350,44  | 334,33  | 28      | Male               | Production hall              | Negative | Positive | Negative | Negative | Positive | Negative | Healthy  | Epidemic | 3 | A |
| 317  | 14.05.2020 | 36,21 | 169,15 | 472,69  | 530,94  | 604,55  | 698,65  | 41      | Male               | Production hall              | Negative | Negative | Negative | Negative | Negative | Negative | Healthy  | Epidemic | 0 | A |
| 318  | 14.05.2020 | 12,85 | 48,61  | 149,45  | 209,72  | 308,81  | 281,86  | 43      | Female             | Health Service               | Negative | Negative | Negative | Negative | Positive | Negative | Healthy  | Epidemic | 3 | A |
| 319  | 14.05.2020 | 66,59 | 67,96  | 283,52  | 191,55  | 521,30  | 184,91  | 28      | Male               | Office                       | Positive | Positive | Positive | Positive | Negative | Positive | Healthy  | Epidemic | 5 | A |
| 320  | 14.05.2020 | 30,37 | 45,63  | 642,01  | 195,48  | 840,76  | 112,94  | 38      | Male               | Office                       | Negative | Negative | Negative | Negative | Negative | Negative | Healthy  | Epidemic | 0 | A |
| 321  | 14.05.2020 | 50,62 | 116,82 | 1016,63 | 443,52  | 461,76  | 658,17  | 69      | Female             | No Data                      | Positive | Positive | Positive | Positive | Negative | Negative | Healthy  | Epidemic | 5 | A |
| 322  | 14.05.2020 | 50,63 | 76,88  | 148,46  | 340,76  | 374,81  | 374,81  | 39      | Female             | Office                       | Negative | Positive | Negative | Negative | Negative | Negative | Healthy  | Epidemic | 2 | A |
| 323  | 18.05.2020 | 23,36 | 67,96  | 186,69  | 324,17  | 277,83  | 373,21  | 27      | Male               | Health Service               | Negative | Negative | Negative | Negative | Negative | Negative | Healthy  | Epidemic | 1 | A |
| 324  | 13.05.2020 | 22,20 | 106,65 | 331,68  | 802,06  | 279,77  | 838,58  | 69      | Male               | Health Service               | Negative | Negative | Positive | Negative | Negative | Negative | Healthy  | Epidemic | 1 | A |
| 325  | 19.05.2020 | 39,72 | 64,98  | 422,54  | 137,52  | 472,41  | 143,93  | 48      | Female             | Laboratory                   | Negative | Negative | Positive | Positive | Negative | Negative | Healthy  | Epidemic | 4 | A |
| 326  | 16.05.2020 | 57,24 | 43,65  | 429,99  | 129,17  | 644,72  | 127,94  | 34      | Female             | Office                       | Negative | Negative | Negative | Negative | Negative | Negative | Healthy  | Epidemic | 0 | A |
| 327  | 16.05.2020 | 39,72 | 60,52  | 990,07  | 394,40  | 680,54  | 147,93  | 30      | Female             | Office                       | Negative | Negative | Negative | Negative | Negative | Negative | Healthy  | Epidemic | 0 | A |
| 328  | 16.05.2020 | 29,21 | 71,92  | 122,14  | 328,09  | 233,30  | 752,62  | 31      | Male               | Office                       | Negative | Negative | Positive | Negative | Negative | Negative | Healthy  | Epidemic | 3 | A |
| 329  | 19.05.2020 | 29,21 | 75,40  | 665,84  | 1218,07 | 484,26  | 50      | Male    | Health Service     | Negative                     | Negative | Positive | Negative | Negative | Negative | Healthy  | Epidemic | 0        | A |   |
| 330  | 19.05.2020 | 39,72 | 68,45  | 282,27  | 239,19  | 868,83  | 394,8   |         |                    |                              |          |          |          |          |          |          |          |          |   |   |



|      |            |        |        |         |         |         |        |         |                |                |          |          |          |          |          |          |          |          |   |   |  |
|------|------------|--------|--------|---------|---------|---------|--------|---------|----------------|----------------|----------|----------|----------|----------|----------|----------|----------|----------|---|---|--|
| 346  | 22.05.2020 | 22,20  | 67,46  | 261,67  | 276,52  | 232,82  | 122,44 | 53      | Female         | Health Service | Negative | Negative | Negative | Negative | Negative | Negative | Healthy  | Epidemic | 0 | A |  |
| 347  | 22.05.2020 | 32,71  | 83,33  | 1054,62 | 487,23  |         | 386,31 | 42      | Female         | Health Service | Negative | Negative | Positive | Negative | Positive | Negative | Healthy  | Epidemic | 4 | A |  |
| 348  | 22.05.2020 | 29,21  | 36,71  | 576,46  | 160,61  | 169,89  | 92,95  | 51      | Female         | Health Service | Negative | Negative | Negative | Negative | Positive | Negative | Healthy  | Epidemic | 0 | A |  |
| 349  | 22.05.2020 | 32,71  | 38,19  | 496,03  | 110,02  | 853,82  | 114,44 | 53      | Male           | Health Service | Negative | Positive | Positive | Positive | Positive | Negative | Healthy  | Epidemic | 6 | A |  |
| 350  | 22.05.2020 | 16,36  | 83,33  | 337,14  | 183,69  | 82,28   | 204,40 | 27      | Female         | Health Service | Negative | Negative | Negative | Negative | Positive | Negative | Healthy  | Epidemic | 1 | A |  |
| 351  | 22.05.2020 | 25,70  | 54,56  | 492,55  | 161,10  | 150,53  | 250,87 | 34      | Male           | Health Service | Negative | Negative | Negative | Negative | Positive | Negative | Healthy  | Epidemic | 0 | A |  |
| 352  | 22.05.2020 | 24,53  | 53,57  | 141,51  | 204,32  | 49,85   | 220,39 | 34      | Male           | Health Service | Negative | Negative | Positive | Negative | Positive | Negative | Healthy  | Epidemic | 4 | A |  |
| 353  | 22.05.2020 | 23,36  | 100,69 | 178,25  | 291,26  | 68,73   | 110,94 | 45      | Male           | Health Service | Negative | Negative | Positive | Positive | Negative | Negative | Healthy  | Epidemic | 3 | A |  |
| 354  | 22.05.2020 | 30,37  | 24,80  | 375,37  | 155,70  | 227,49  | 110,44 | 51      | Female         | Health Service | Negative | Negative | Negative | Negative | Positive | Negative | Healthy  | Epidemic | 0 | A |  |
| 355  | 22.05.2020 | 29,21  | 93,25  | 724,43  | 234,28  |         | 265,87 | 43      | Female         | Health Service | Negative | Positive | Positive | Positive | Positive | Negative | Healthy  | Epidemic | 4 | A |  |
| 356  | 22.05.2020 | 25,70  | 40,67  | 272,59  | 145,87  | 114,71  | 172,91 | 56      | Male           | Health Service | Negative | Negative | Negative | Negative | Positive | Negative | Healthy  | Epidemic | 0 | A |  |
| 357  | 22.05.2020 | 23,36  | 49,60  | 270,11  | 196,46  | 43,56   | 214,39 | 42      | Female         | Health Service | Negative | Negative | Negative | Negative | Positive | Negative | Healthy  | Epidemic | 1 | A |  |
| 358  | 22.05.2020 | 45,95  | 52,83  | 1098,31 | 234,28  |         | 533,48 | 45      | Male           | Health Service | Negative | Negative | Negative | Negative | Negative | Negative | Healthy  | Epidemic | 0 | A |  |
| 359  | 22.05.2020 | 40,89  | 47,12  | 514,40  | 173,87  | 134,56  | 163,92 | 34      | Male           | Health Service | Negative | Negative | Negative | Negative | Negative | Negative | Healthy  | Epidemic | 0 | A |  |
| 360  | 22.05.2020 | 37,38  | 45,14  | 370,90  | 114,93  | 629,72  | 87,46  | 40      | Female         | Health Service | Negative | Negative | Negative | Negative | Negative | Negative | Healthy  | Epidemic | 0 | A |  |
| 361  | 22.05.2020 | 29,21  | 49,60  | 456,80  | 131,63  | 64,86   | 199,40 | 26      | Male           | Health Service | Negative | Negative | Negative | Negative | Negative | Negative | Healthy  | Epidemic | 1 | A |  |
| 362  | 22.05.2020 | 23,36  | 50,60  | 60,58   | 114,44  | 60,02   | 132,43 | 61      | Male           | Health Service | Negative | Negative | Negative | Negative | Negative | Negative | Healthy  | Epidemic | 0 | A |  |
| 363  | 22.05.2020 | 26,87  | 58,04  | 285,50  | 110,02  | 152,47  | 616,19 | 58      | Female         | Health Service | Negative | Negative | Negative | Negative | Negative | Negative | Healthy  | Epidemic | 0 | A |  |
| 364  | 22.05.2020 | 15,19  | 105,16 | 72,00   | 221,51  | 30,98   | 352,32 | 42      | Male           | Health Service | Positive | Positive | Positive | Negative | Negative | Negative | Healthy  | Epidemic | 4 | A |  |
| 365  | 22.05.2020 | 18,69  | 63,00  | 183,71  | 195,48  | 66,31   | 248,38 | No Data | Male           | Health Service | Positive | Positive | Positive | Negative | Negative | Negative | Healthy  | Epidemic | 3 | A |  |
| 366  | 22.05.2020 | 17,52  | 17,36  | 186,69  | 42,24   | 49,37   | 49,48  | 59      | Male           | Health Service | Negative | Negative | Negative | Negative | Negative | Negative | Healthy  | Epidemic | 0 | A |  |
| 367  | 22.05.2020 | 26,87  | 152,28 | 395,73  | 529,96  | 86,16   |        | 52      | Male           | Health Service | Negative | Negative | Negative | Negative | Negative | Negative | Healthy  | Epidemic | 0 | A |  |
| 368  | 22.05.2020 | 33,88  | 137,40 | 541,21  | 584,48  |         |        | 49      | Male           | Health Service | Negative | Negative | Negative | Negative | Negative | Negative | Healthy  | Epidemic | 0 | A |  |
| 369  | 22.05.2020 | 18,69  | 63,99  | 155,41  | 134,58  | 68,25   | 160,92 | 37      | Female         | Health Service | Negative | Negative | Negative | Negative | Negative | Negative | Healthy  | Epidemic | 0 | A |  |
| 370  | 22.05.2020 | 24,53  | 49,11  | 189,67  | 195,97  | 82,28   | 130,43 | 43      | Female         | Health Service | Negative | Negative | Negative | Negative | Negative | Negative | Healthy  | Epidemic | 0 | A |  |
| 371  | 22.05.2020 | 22,20  | 17,36  | 236,35  | 67,29   | 78,41   | 59,47  | 57      | Female         | Health Service | Negative | Negative | Negative | Negative | Negative | Negative | Healthy  | Epidemic | 0 | A |  |
| 372  | 22.05.2020 | 25,70  | 47,62  | 202,58  | 166,50  | 45,50   | 246,38 | 56      | Female         | Health Service | Negative | Positive | Positive | Negative | Negative | Negative | Healthy  | Epidemic | 5 | A |  |
| 373  | 22.05.2020 | 25,70  | 42,66  | 173,29  | 110,02  | 54,70   | 102,45 | 49      | Female         | Health Service | Negative | Negative | Negative | Negative | Negative | Negative | Healthy  | Epidemic | 0 | A |  |
| 374  | 22.05.2020 | 17,52  | 27,28  | 96,82   | 89,88   | 47,92   | 287,86 | 35      | Male           | Health Service | Negative | Negative | Negative | Negative | Negative | Negative | Healthy  | Epidemic | 0 | A |  |
| 375  | 22.05.2020 | 12,85  | 40,18  | 81,43   | 115,91  | 156,10  | 170,91 | 38      | Male           | Health Service | Negative | Negative | Negative | Negative | Negative | Negative | Healthy  | Epidemic | 0 | A |  |
| 376  | 22.05.2020 | 17,52  | 46,13  | 106,26  | 161,59  | 210,79  | 761,62 | 32      | Male           | Health Service | Positive | Positive | Negative | Negative | Positive | Negative | Healthy  | Epidemic | 2 | A |  |
| 377  | 22.05.2020 | 31,54  | 25,79  | 306,85  | 89,39   | 1166,51 | 112,94 | 51      | Female         | Health Service | Negative | Negative | Negative | Negative | Negative | Negative | Healthy  | Epidemic | 0 | A |  |
| 378  | 22.05.2020 | 19,86  | 21,83  | 7,94    | 56,97   | 295,26  | 23,99  | 55      | Female         | Health Service | Positive | Positive | Negative | Negative | Positive | Negative | Healthy  | Epidemic | 5 | A |  |
| 379  | 22.05.2020 | 26,87  | 40,18  | 55,61   | 223,97  | 1159,24 | 182,41 | 60      | Female         | Health Service | Negative | Negative | Positive | Negative | Positive | Negative | Healthy  | Epidemic | 3 | A |  |
| 380  | 22.05.2020 | 23,36  | 36,71  | 2,98    | 282,91  | 327,93  | 220,89 | 44      | Female         | Health Service | Negative | Negative | Negative | Negative | Negative | Negative | Healthy  | Epidemic | 0 | A |  |
| 381  | 22.05.2020 | 24,53  | 41,67  | 62,07   | 92,83   | 703,29  | 126,94 | 32      | Female         | Health Service | Negative | Negative | Positive | Negative | Positive | Negative | Healthy  | Epidemic | 4 | A |  |
| 382  | 22.05.2020 | 22,20  | 34,23  | 9,43    | 183,20  | 439,98  | 149,43 | 53      | Female         | Health Service | Negative | Positive | Positive | Negative | Positive | Negative | Healthy  | Epidemic | 5 | A |  |
| 383  | 22.05.2020 | 24,53  | 61,51  | 1,49    | 180,26  | 337,85  | 255,37 | No Data | Female         | Health Service | Negative | Negative | Negative | Negative | Negative | Negative | Healthy  | Epidemic | 0 | A |  |
| 384  | 22.05.2020 | 14,02  | 22,32  | 2,48    | 69,74   | 183,45  | 99,95  | 49      | Female         | Health Service | Negative | Negative | Negative | Negative | Negative | Negative | Healthy  | Epidemic | 0 | A |  |
| 385  | 22.05.2020 | 21,03  | 39,19  | 9,93    | 215,62  | 844,39  | 209,90 | 45      | Female         | Health Service | Negative | Negative | Negative | Negative | Negative | Negative | Healthy  | Epidemic | 1 | A |  |
| 386  | 22.05.2020 | 35,83  | 53,32  | 281,78  | 163,06  |         | 226,14 | 50      | Female         | Health Service | Negative | Negative | Negative | Negative | Negative | Negative | Healthy  | Epidemic | 0 | A |  |
| 387  | 22.05.2020 | 18,69  | 23,31  | 1,99    | 83,50   | 272,75  | 107,45 | 50      | Male           | Office         | Positive | Positive | Positive | Negative | Positive | Negative | Healthy  | Epidemic | 3 | A |  |
| 388  | 22.05.2020 | 18,69  | 29,27  | 1,49    | 101,18  | 401,50  | 169,92 | 42      | Female         | Health Service | Negative | Negative | Positive | Negative | Positive | Negative | Healthy  | Epidemic | 2 | A |  |
| 389  | 22.05.2020 | 17,52  | 41,67  | 6,95    | 114,93  | 214,18  | 325,84 | 26      | Male           | Health Service | Negative | Negative | Negative | Negative | Negative | Negative | Healthy  | Epidemic | 0 | A |  |
| 390  | 22.05.2020 | 23,36  | 48,61  | 22,84   | 82,51   | 185,87  | 113,94 | 55      | Female         | Health Service | Negative | Positive | Positive | Negative | Positive | Positive | Healthy  | Epidemic | 6 | A |  |
| 391  | 22.05.2020 | 18,69  | 37,20  | 13,90   | 166,50  | 699,18  | 144,43 | 66      | Female         | Health Service | Negative | Negative | Negative | Negative | Positive | Negative | Healthy  | Epidemic | 0 | A |  |
| 392  | 22.05.2020 | 25,70  | 25,79  | 7,45    | 84,97   | 912,63  | 71,96  | 49      | Female         | Health Service | Negative | Positive | Positive | Negative | Positive | Negative | Healthy  | Epidemic | 5 | A |  |
| 393  | 22.05.2020 | 21,03  | 375,00 | 2,48    | 396,86  | 645,45  | 659,17 | 48      | Male           | Health Service | Negative | Negative | Negative | Negative | Positive | Positive | Healthy  | Epidemic | 4 | A |  |
| 394  | 22.05.2020 | 23,36  | 23,31  | 5,96    | 181,24  | 398,35  | 170,91 | 27      | Female         | Health Service | Negative | Negative | Negative | Negative | Negative | Negative | Healthy  | Epidemic | 1 | A |  |
| 395  | 24.05.2020 | 58,41  | 29,27  | 638,78  | 175,34  |         | 140,43 | 21      | Female         | Student        | Negative | Negative | Negative | Negative | Negative | Negative | Healthy  | Epidemic | 1 | A |  |
| 395B | 12.10.2020 | 37,38  | 23,81  | 371,40  | 58,94   | 515,00  | 89,96  | 21      | Female         | Student        | Negative | Negative | Negative | Negative | Negative | Negative | Healthy  | Epidemic | 1 | B |  |
| 396  | 24.05.2020 | 168,22 | 248,51 | 450,10  | 228,39  | 539,69  | 361,32 | 46      | Male           | Education      | Negative | Positive | Negative | Negative | Negative | Negative | Healthy  | Epidemic | 3 | A |  |
| 396B | 08.10.2020 | 37,38  | 56,55  | 393,25  | 123,77  | 723,14  | 132,93 | 46      | Male           | Education      | Negative | Positive | Negative | Negative | Negative | Negative | Healthy  | Epidemic | 3 | B |  |
| 397  | 06.07.2020 | 16,36  | 21,83  | 139,52  | 53,54   | 213,21  | 52,47  | 25      | Female         | Health Service | Negative | Positive | Negative | Negative | Positive | Negative | Healthy  | Epidemic | 4 | A |  |
| 398  | 28.05.2020 | 16,36  | 77,88  | 107,25  | 173,38  | 171,35  | 141,43 | 46      | Female         | Health Service | Negative | Positive | Positive | Negative | Negative | Negative | Healthy  | Epidemic | 3 | A |  |
| 399  | 03.06.2020 | 44,39  | 57,54  | 768,62  | 1404,72 | 1197,48 |        | No Data | No Data        | No Data        | No Data  | No Data  | No Data  | No Data  | No Data  | Healthy  | Epidemic | 0        | A |   |  |
| 400  | 28.05.2020 | 30,37  | 67,46  | 3,48    | 188,85  | 114,71  | 234,38 | 55      | Female         | Health Service | Negative | Negative | Negative | Negative | Negative | Negative | Healthy  | Epidemic | 0 | A |  |
| 401  | 23.05.2020 | 14,02  | 55,06  | 3,97    | 211,20  | 261,87  | 42     | Female  | Health Service | Negative       | Negative | Negative | Negative | Negative | Negative | Healthy  | Epidemic | 0        | A |   |  |
| 402  | 23.05.2020 | 11,68  | 37,20  | 3,48    | 114,93  | 1,94    | 188,91 | 49      | Female         | Health Service | Negative | Negative | Negative | Negative | Positive | Negative | Healthy  | Epidemic | 1 | A |  |
| 403  | 23.05.2020 | 28,04  | 129,96 | 170,80  | 315,32  | 2,90    | 362,32 | 60      | Female         | No Data        | Negative | Negative | Positive | Negative | Positive | Negative | Healthy  | Epidemic | 2 | A |  |
| 404  | 23.05.2020 | 18,69  | 39,68  | 126,61  | 98,72   | 4,36    | 91,45  | 46      | Male           | Health Service | Negative | Negative | Negative | Negative | Negative | Negative | Healthy  | Epidemic | 0 | A |  |

## COVID

| Sample | Sample Date | Anty-N IgG | Anty-N IgA | Anty-S1 IgA | Anty-S1 IgG | Anty-E IgG | Anty-E IgA | Age     | Gender  | Workplace      | Temperature Over 38 | Temperature over 37 | Cough    | Breath difficulties | Runny nose | Smell and taste disorders | Status | Date Status | Number of Symptoms | Sample order | Course of illness (COVID only) |
|--------|-------------|------------|------------|-------------|-------------|------------|------------|---------|---------|----------------|---------------------|---------------------|----------|---------------------|------------|---------------------------|--------|-------------|--------------------|--------------|--------------------------------|
| COV1   | 26.04.2020  | 37,85      | 129,96     | 630,71      | 1024,08     | 877,56     | 69         |         | Female  | No Data        | Negative            | Negative            | Negative | Negative            | Negative   | Negative                  | COVID  | Epidemic    | 0                  | A            |                                |
| COV10  | 05.05.2020  | 22,20      | 61,26      | 174,78      | 478,39      | 641,34     | 718,64     | No Data | No Data | No Data        | No Data             | No Data             | No Data  | No Data             | No Data    | No Data                   | COVID  | Epidemic    | 0                  | A            | No data                        |
| COV11  | 05.05.2020  | 827,10     | 543,15     | 1182,72     | 703,34      | 504,84     | 633,18     | 47      | Male    | No Data        | Positive            | Positive            | Negative | Negative            | Negative   | Negative                  | COVID  | Epidemic    | 3                  | A            | severe                         |
| COV12  | 05.05.2020  | 14,02      | 17,61      | 42,20       | 86,94       | 232,33     | 251,37     | 31      | Female  | No Data        | Negative            | Negative            | Negative | Positive            | Negative   | Negative                  | COVID  | Epidemic    | 2                  | A            | mild                           |
| COV13  | 05.05.2020  | 144,86     | 187,25     | 92,85       | 89,64       | 900,94     | 229,89     | 53      | Female  | Health Service | Negative            | Negative            | Negative | Negative            | Negative   | Negative                  | COVID  | Epidemic    | 1                  | A            | mild                           |
| COV14  | 05.05.2020  | 24,53      | 25,05      | 337,64      | 70,24       | 515,97     | 186,91     | 24      | Female  | No Data        | Negative            | Negative            | Negative | Negative            | Negative   | Negative                  | COVID  | Epidemic    | 0                  | A            | asymptomatic                   |
| COV15  | 05.05.2020  | 543,22     | 1181,55    | 229,89      | 218,57      | 1091,80    | 703,15     | 58      | Female  | Health Service | Negative            | Positive            | Positive | Negative            | Negative   | Negative                  | COVID  | Epidemic    | 3                  | A            | mild                           |
| COV16  | 05.05.2020  | 1000,00    | 1000,00    | 1000,00     | 1000,00     | 1000,00    | 1000,00    | 71      | Female  | No Data        | Negative            | Negative            | Negative | Negative            | Negative   | Negative                  | COVID  | Epidemic    | 0                  | A            | asymptomatic                   |
| COV17  | 05.0        |            |            |             |             |            |            |         |         |                |                     |                     |          |                     |            |                           |        |             |                    |              |                                |

|        |            |          |        |         |        |          |        |    |        |                |          |          |          |          |          |          |       |          |   |   |              |
|--------|------------|----------|--------|---------|--------|----------|--------|----|--------|----------------|----------|----------|----------|----------|----------|----------|-------|----------|---|---|--------------|
| COV26B | 04.06.2020 | 82,94    | 177,83 | 835,15  | 673,87 | 770,45   | 146,09 | 51 | Female | Health Service | Negative | Negative | Positive | Negative | Negative | Positive | COVID | Epidemic | 3 | B | mild         |
| COV26C | 09.06.2020 | 98,13    | 103,67 | 1305,86 | 565,32 | 388,19   | 116,44 | 51 | Female | Health Service | Negative | Negative | Positive | Negative | Negative | Positive | COVID | Epidemic | 3 | C | mild         |
| COV26D | 24.09.2020 | 28,04    | 34,72  | 516,39  | 120,83 | 766,70   | 64,97  | 51 | Female | Health Service | Negative | Negative | Positive | Negative | Negative | Positive | COVID | Epidemic | 3 | D | mild         |
| COV27  | 09.06.2020 | 75,93    | 31,00  | 1932,47 | 100,93 | 1692,88  | 84,46  | 35 | Male   | No Data        | Negative | Negative | Negative | Negative | Negative | Negative | COVID | Epidemic | 0 | A | asymptomatic |
| COV28  | 09.06.2020 | 44,39    | 55,06  | 332,67  | 141,94 | 315,59   | 186,66 | 28 | Male   | Health Service | Negative | Negative | Negative | Negative | Negative | Negative | COVID | Epidemic | 0 | A | asymptomatic |
| COV28B | 21.07.2020 | 28,04    | 37,70  | 215,49  | 83,50  | 220,72   | 55,97  | 28 | Male   | Health Service | Negative | Negative | Negative | Negative | Negative | Negative | COVID | Epidemic | 0 | B | asymptomatic |
| COV28C | 24.09.2020 | 28,04    | 31,75  | 210,53  | 77,60  | 173,28   | 76,96  | 28 | Male   | Health Service | Negative | Negative | Negative | Negative | Negative | Negative | COVID | Epidemic | 0 | C | asymptomatic |
| COV29A | 09.06.2020 | 91,12    | 70,93  | 462,76  | 139,00 | 546,47   | 148,43 | 29 | Male   | Health Service | Negative | Negative | Negative | Negative | Negative | Negative | COVID | Epidemic | 0 | A | asymptomatic |
| COV29B | 21.07.2020 | 93,46    | 55,56  | 345,55  | 119,84 | 223,96   | 53,47  | 29 | Male   | Health Service | Negative | Negative | Negative | Negative | Negative | Negative | COVID | Epidemic | 0 | B | asymptomatic |
| COV29C | 24.09.2020 | 116,82   | 38,68  | 307,35  | 99,21  | 159,73   | 65,97  | 29 | Male   | Health Service | Negative | Negative | Negative | Negative | Negative | Negative | COVID | Epidemic | 0 | C | asymptomatic |
| COV3   | 05.05.2020 | 729,75   | 300,60 | 393,99  | 291,75 | 191,51   | 440,78 | 30 | Male   | No Data        | Negative | Negative | Negative | Negative | Negative | Negative | COVID | Epidemic | 0 | A | asymptomatic |
| COV30A | 09.06.2020 | 299,07   |        |         | 449,90 | 808,33   | 919,79 | 85 | Male   | No Data        | Negative | Negative | Negative | Negative | Negative | Negative | COVID | Epidemic | 0 | A | asymptomatic |
| COV4   | 05.05.2020 | 53,15    | 40,34  | 386,05  | 203,59 | 389,16   | 270,36 | 24 | Female | Health Service | Negative | Negative | Negative | Negative | Negative | Negative | COVID | Epidemic | 0 | A | asymptomatic |
| COV5   | 05.05.2020 | 53,27    | 57,66  | 302,71  | 138,26 | 255,24   | 155,42 | 56 | Male   | No Data        | Positive | Positive | Positive | Negative | Negative | Negative | COVID | Epidemic | 4 | A | moderate     |
| COV6   | 05.05.2020 | 172,31   | 103,84 | 115,52  | 131,63 | 514,36   | 197,23 | 49 | Female | Health Service | Negative | Negative | Positive | Negative | Negative | Negative | COVID | Epidemic | 2 | A | mild         |
| COV7   | 05.05.2020 | 32,71    | 25,63  | 38,73   | 148,98 | 1136,50  | 96,12  | 78 | Female | No Data        | Negative | Negative | Negative | Negative | Negative | Negative | COVID | Epidemic | 0 | A | asymptomatic |
| COV8   | 05.05.2020 | 41,59    | 75,52  | 64,30   | 120,46 | 297,80   | 186,74 | 49 | Female | Health Service | Negative | Positive | Positive | Negative | Negative | Negative | COVID | Epidemic | 2 | A | mild         |
| COV9   | 05.05.2020 | 78,27    | 18,11  | 31,78   | 69,25  | 184,41   | 55,47  | 30 | Male   | No Data        | Negative | Negative | Negative | Negative | Negative | Negative | COVID | Epidemic | 0 | A | asymptomatic |
| COV19B | 27.11.2020 | 57,41627 | 72     | 354,5   | 285    | 571,8623 |        | 50 | Female | Health Service | Negative | Negative | Negative | Negative | Negative | Negative | COVID | Epidemic | 0 | B | asymptomatic |
| COV19C | 05.12.2020 | 52,63158 | 78     | 309,5   | 120,5  | 444,332  |        | 50 | Female | Health Service | Negative | Negative | Negative | Negative | Negative | Negative | COVID | Epidemic | 0 | C | asymptomatic |
| COV20B | 27.11.2020 | 33,49282 | 132    | 198,5   | 59     | 211,5    |        | 46 | Male   | Army           | Negative | Positive | Negative | Negative | Negative | Negative | COVID | Epidemic | 4 | B | moderate     |
| COV20C | 05.12.2020 | 94,09888 | 116    | 400,5   | 98,5   | 825,9109 |        | 46 | Male   | Army           | Negative | Positive | Negative | Negative | Negative | Negative | COVID | Epidemic | 4 | C | moderate     |

## Historical

| Sample      | Sample Date | Anty-N IgG | Anty-N IgA | Anty-S1 IgG | Anty-S1 IgA | Anty-E IgG | Anty-E IgA | Age     | Gender  | Workplace | Temperature Over 38 | Temperature over 37 | Cough   | Breath difficulties | Runny nose | Smell and taste disorders | Status     | Date Status | Number of Symptoms | Sample order | Course of illness (COVID only) |
|-------------|-------------|------------|------------|-------------|-------------|------------|------------|---------|---------|-----------|---------------------|---------------------|---------|---------------------|------------|---------------------------|------------|-------------|--------------------|--------------|--------------------------------|
| HS1         | 2010        | 39,72      | 20,34      | 234,86      | 82,51       | 525,65     | 107,95     | 24      | Female  | No Data   | No Data             | No Data             | No Data | No Data             | No Data    | No Data                   | Historical | <2019       |                    | A            |                                |
| HS10        | 2010        | 37,38      | 14,38      | 180,73      | 249,51      | 288,00     | 236,38     | 31      | Male    | No Data   | No Data             | No Data             | No Data | No Data             | No Data    | No Data                   | Historical | <2019       |                    | A            |                                |
| HS11        | 2010        | 18,69      | 16,87      | 230,39      | 147,84      | 179,09     | 135,43     | 28      | Male    | No Data   | No Data             | No Data             | No Data | No Data             | No Data    | No Data                   | Historical | <2019       |                    | A            |                                |
| HS12        | 2010        | 11,68      | 11,41      | 1314,80     | 80,55       | 442,40     | 185,41     | 25      | Male    | No Data   | No Data             | No Data             | No Data | No Data             | No Data    | No Data                   | Historical | <2019       |                    | A            |                                |
| HS13        | 2010        | 228,97     | 15,87      | 449,35      | 322,20      | 553,73     | 226,39     | 29      | Female  | No Data   | No Data             | No Data             | No Data | No Data             | No Data    | No Data                   | Historical | <2019       |                    | A            |                                |
| HS14        | 2010        | 51,40      | 9,92       | 1074,48     | 71,71       | 67,97      | 67,97      | 22      | Female  | No Data   | No Data             | No Data             | No Data | No Data             | No Data    | No Data                   | Historical | <2019       |                    | A            |                                |
| HS15        | 2010        | 35,05      | 16,87      | 569,02      | 217,09      | 248,79     | 167,92     | 25      | Male    | No Data   | No Data             | No Data             | No Data | No Data             | No Data    | No Data                   | Historical | <2019       |                    | A            |                                |
| HS16        | 2010        | 56,07      | 40,67      | 682,72      | 302,06      | 657,79     | 450,77     | 25      | Male    | No Data   | No Data             | No Data             | No Data | No Data             | No Data    | No Data                   | Historical | <2019       |                    | A            |                                |
| HS17        | 2010        | 67,76      | 27,78      | 1017,87     | 156,68      | 468,05     | 149,93     | 27      | Female  | No Data   | No Data             | No Data             | No Data | No Data             | No Data    | No Data                   | Historical | <2019       |                    | A            |                                |
| HS18        | 2010        | 46,73      | 118,55     | 668,82      | 835,46      | 1336,88    | 835,58     | 33      | Male    | No Data   | No Data             | No Data             | No Data | No Data             | No Data    | No Data                   | Historical | <2019       |                    | A            |                                |
| HS19        | 2010        | 51,40      | 59,03      | 3,97        | 243,12      | 264,37     | 264,37     | 24      | Male    | No Data   | No Data             | No Data             | No Data | No Data             | No Data    | No Data                   | Historical | <2019       |                    | A            |                                |
| HS2         | 2010        | 14,02      | 12,40      | 408,14      | 58,94       | 1178,61    | 44,98      | 27      | Female  | No Data   | No Data             | No Data             | No Data | No Data             | No Data    | No Data                   | Historical | <2019       |                    | A            |                                |
| HS20        | 2010        | 37,38      | 32,74      | 538,73      | 303,54      | 307,84     | 133,43     | 25      | Male    | No Data   | No Data             | No Data             | No Data | No Data             | No Data    | No Data                   | Historical | <2019       |                    | A            |                                |
| HS21        | 2010        | 37,38      | 17,86      | 336,15      | 291,26      | 431,75     | 153,42     | 21      | Female  | No Data   | No Data             | No Data             | No Data | No Data             | No Data    | No Data                   | Historical | <2019       |                    | A            |                                |
| HS22        | 2010        | 25,70      | 22,32      | 415,09      | 152,26      | 455,95     | 83,46      | 22      | Male    | No Data   | No Data             | No Data             | No Data | No Data             | No Data    | No Data                   | Historical | <2019       |                    | A            |                                |
| HS23        | 2010        | 25,70      | 35,71      | 224,93      | 206,78      | 393,51     | 205,40     | 32      | Male    | No Data   | No Data             | No Data             | No Data | No Data             | No Data    | No Data                   | Historical | <2019       |                    | A            |                                |
| HS24        | 2010        | 39,72      | 35,22      | 579,44      | 256,39      | 636,01     | 164,42     | 19      | Male    | No Data   | No Data             | No Data             | No Data | No Data             | No Data    | No Data                   | Historical | <2019       |                    | A            |                                |
| HS25        | 2010        | 46,73      | 19,84      | 487,09      | 145,87      | 443,37     | 278,86     | 21      | Male    | No Data   | No Data             | No Data             | No Data | No Data             | No Data    | No Data                   | Historical | <2019       |                    | A            |                                |
| HS3         | 2010        | 46,73      | 62,50      | 1003,97     | 257,37      | 938,04     | 291,85     | 27      | Female  | No Data   | No Data             | No Data             | No Data | No Data             | No Data    | No Data                   | Historical | <2019       |                    | A            |                                |
| HS4         | 2010        | 30,37      | 54,56      | 505,96      | 343,81      | 328,17     | 269,87     | 25      | Male    | No Data   | No Data             | No Data             | No Data | No Data             | No Data    | No Data                   | Historical | <2019       |                    | A            |                                |
| HS5         | 2010        | 44,39      | 58,04      | 548,66      | 238,21      | 588,58     | 296,35     | 27      | Male    | No Data   | No Data             | No Data             | No Data | No Data             | No Data    | No Data                   | Historical | <2019       |                    | A            |                                |
| HS6         | 2010        | 58,41      | 34,23      | 508,44      | 273,58      | 466,60     | 197,40     | 25      | Male    | No Data   | No Data             | No Data             | No Data | No Data             | No Data    | No Data                   | Historical | <2019       |                    | A            |                                |
| HS7         | 2010        | 35,05      | 35,71      | 482,62      | 258,84      | 939,01     | 169,92     | 24      | Male    | No Data   | No Data             | No Data             | No Data | No Data             | No Data    | No Data                   | Historical | <2019       |                    | A            |                                |
| HS8         | 2010        | 49,07      | 37,20      | 531,78      | 76,62       | 441,43     | 95,45      | 25      | Male    | No Data   | No Data             | No Data             | No Data | No Data             | No Data    | No Data                   | Historical | <2019       |                    | A            |                                |
| HS9         | 2010        | 35,05      | 39,19      | 321,25      | 235,76      | 827,69     | 313,84     | 25      | Male    | No Data   | No Data             | No Data             | No Data | No Data             | No Data    | No Data                   | Historical | <2019       |                    | A            |                                |
| 244 in 2017 | 2017        | 53,74      | 90,77      | 447,86      | 368,37      | 1057,60    | 219,87     | 27      | Female  | No Data   | No Data             | No Data             | No Data | No Data             | No Data    | No Data                   | Historical | <2019       |                    | A            |                                |
| 242 in 2017 | 2017        | 14,02      | 16,87      | 546,18      | 72,69       | 436,11     | 244,88     | 26      | Male    | No Data   | No Data             | No Data             | No Data | No Data             | No Data    | No Data                   | Historical | <2019       |                    | A            |                                |
| HS113       | 2017        | 11,68      | 45,14      | 110,72      | 156,68      | 185,87     | 238,88     | No Data | No Data | No Data   | No Data             | No Data             | No Data | No Data             | No Data    | No Data                   | Historical | <2019       |                    | A            |                                |
| HS114       | 2017        | 42,06      | 19,35      | 743,79      | 115,91      | 77,44      | 44,48      | No Data | No Data | No Data   | No Data             | No Data             | No Data | No Data             | No Data    | No Data                   | Historical | <2019       |                    | A            |                                |
| HS116       | 2017        | 4,67       | 65,48      | 72,00       | 231,83      | 241,53     | 191,90     | No Data | No Data | No Data   | No Data             | No Data             | No Data | No Data             | No Data    | No Data                   | Historical | <2019       |                    | A            |                                |
| HS117       | 2017        | 21,03      | 39,19      | 101,79      | 134,58      | 105,52     | 92,45      | No Data | No Data | No Data   | No Data             | No Data             | No Data | No Data             | No Data    | No Data                   | Historical | <2019       |                    | A            |                                |
| HS118       | 2017        | 25,70      | 33,23      | 287,49      | 98,23       | 104,07     | 76,46      | No Data | No Data | No Data   | No Data             | No Data             | No Data | No Data             | No Data    | No Data                   | Historical | <2019       |                    | A            |                                |
| HS119       | 2017        | 32,71      | 17,36      | 869,91      | 87,92       | 206,20     | 66,47      | No Data | No Data | No Data   | No Data             | No Data             | No Data | No Data             | No Data    | No Data                   | Historical | <2019       |                    | A            |                                |
| HS120       | 2017        | 25,70      | 85,32      | 286,00      | 526,03      | 157,79     | 238,38     | No Data | No Data | No Data   | No Data             | No Data             | No Data | No Data             | No Data    | No Data                   | Historical | <2019       |                    | A            |                                |
| HS121       | 2017        | 16,36      | 90,77      | 270,61      | 217,58      | 293,32     | 737,13     | No Data | No Data | No Data   | No Data             | No Data             | No Data | No Data             | No Data    | No Data                   | Historical | <2019       |                    | A            |                                |
| HS122       | 2017        | 28,04      | 65,48      | 607,75      | 232,81      | 233,79     | 235,38     | No Data | No Data | No Data   | No Data             | No Data             | No Data | No Data             | No Data    | No Data                   | Historical | <2019       |                    | A            |                                |
| HS123       | 2017        | 9,35       | 12,90      | 125,62      | 78,59       | 281,22     | 22,49      | No Data | No Data | No Data   | No Data             | No Data             | No Data | No Data             | No Data    | No Data                   | Historical | <2019       |                    | A            |                                |
| HS125       | 2017        | 11,68      | 18,85      | 82,92       | 69,25       | 343,66     | 27,99      | No Data | No Data | No Data   | No Data             | No Data             | No Data | No Data             | No Data    | No Data                   | Historical | <2019       |                    | A            |                                |
| HS126       | 2017        | 30,37      | 19,84      | 476,17      | 158,15      | 347,05     | 74,46      | No Data | No Data | No Data   | No Data             | No Data             | No Data | No Data             | No Data    | No Data                   | Historical | <2019       |                    | A            |                                |
| HS127       | 2017        | 23,36      | 16,87      | 171,30      | 85,95       | 1134,56    | 53,97      | No Data | No Data | No Data   | No Data             | No Data             | No Data | No Data             | No Data    | No Data                   | Historical | <2019       |                    | A            |                                |
| HS128       | 2017        | 56,07      | 28,27      | 463,26      | 325,64      | 256,05     | 101,95     | No Data | No Data | No Data   | No Data             | No Data             | No Data | No Data             | No Data    | No Data                   | Historical | <2019       |                    | A            |                                |
| HS129       | 2017        | 9,35       | 19,84      | 32,77       | 131,63      | 319,94     | 72,96      | No Data | No Data | No Data   | No Data             | No Data             | No Data | No Data             | No Data    | No Data                   | Historical | <2019       |                    | A            |                                |
| HS130       | 2017        | 32,71      | 29,27      | 145,98      | 108,55      | 302,52     | 63,97      | No Data | No Data | No Data   | No Data             | No Data             | No Data | No Data             | No Data    | No Data                   | Historical | <2019       |                    | A            |                                |
| HS131       | 2017        | 28,04      | 38,19      | 231,38      | 109,53      | 232,82     | 159,92     | No Data | No Data | No Data   | No Data             | No Data             | No Data | No Data             | No Data    | No Data                   | Historical | <2019       |                    | A            |                                |
| HS132       | 2017        | 32,71      | 57,54      | 599,80      | 479,86      | 153,92     | 143,93     | No Data | No Data | No Data   | No Data             | No Data             | No Data | No Data             | No Data    | No Data                   | Historical | <2019       |                    | A            |                                |
| HS133       | 2017        | 14,02      | 21,33      | 122,14      | 81,04       | 179,57     | 93,95      | No Data | No Data | No Data   | No Data             | No Data             | No Data | No Data             | No Data    | No Data                   | Historical | <2019       |                    | A            |                                |
| HS130       | 2017        | 25,70      | 26,39      | 188,30      | 144,40      | 288,13     | 124,94     | 21      | Male    | No Data   | No Data             | No Data             | No Data | No Data             | No Data    | No Data                   | Historical | <2019       |                    | A            |                                |
| HS171       | 2017        | 44,39      | 43,15      | 701,09</    |             |            |            |         |         |           |                     |                     |         |                     |            |                           |            |             |                    |              |                                |

|        |            |       |        |        |        |         |        |    |        |         |         |         |         |         |         |         |            |              |  |   |
|--------|------------|-------|--------|--------|--------|---------|--------|----|--------|---------|---------|---------|---------|---------|---------|---------|------------|--------------|--|---|
| HIS186 | 2017       | 11,68 | 8,93   |        | 88,90  | 220,72  | 89,96  | 28 | Male   | No_Data | No_Data | No_Data | No_Data | No_Data | No_Data | No_Data | Historical | <2019        |  | A |
| HIS187 | 2017       | 7,01  | 4,96   |        | 25,54  | 244,92  | 523,24 | 31 | Female | No_Data | No_Data | No_Data | No_Data | No_Data | No_Data | No_Data | Historical | <2019        |  | A |
| E181   | 10.12.2019 | 51,40 | 45,14  | 248,26 | 155,70 | 786,87  | 186,66 | 71 | Male   | No_Data | No_Data | No_Data | No_Data | No_Data | No_Data | No_Data | Historical | Pre-epidemic |  | A |
| E182   | 10.12.2019 | 46,73 | 49,60  | 548,16 | 157,17 | 615,68  | 187,91 | 58 | Male   | No_Data | No_Data | No_Data | No_Data | No_Data | No_Data | No_Data | Historical | Pre-epidemic |  | A |
| E196   | 28.01.2020 | 39,72 | 98,21  |        | 196,46 | 527,83  | 490,75 | 72 | Female | No_Data | No_Data | No_Data | No_Data | No_Data | No_Data | No_Data | Historical | Pre-epidemic |  | A |
| E198   | 28.01.2020 | 42,06 | 24,80  | 19,86  | 165,52 | 1112,78 | 108,95 | 60 | Female | No_Data | No_Data | No_Data | No_Data | No_Data | No_Data | No_Data | Historical | Pre-epidemic |  | A |
| E201   | 28.01.2020 | 49,65 | 75,64  | 23,50  | 264,98 | 1121,97 | 565,97 | 73 | Male   | No_Data | No_Data | No_Data | No_Data | No_Data | No_Data | No_Data | Historical | Pre-epidemic |  | A |
| E222   | 03.03.2020 | 33,49 | 132,69 | 442,40 | 445,48 | 1602,13 | 752,37 | 52 | Male   | No_Data | No_Data | No_Data | No_Data | No_Data | No_Data | No_Data | Historical | Pre-epidemic |  | A |
| E226   | 10.03.2020 | 92,68 | 101,19 | 523,01 | 428,05 | 1959,34 | 645,43 | 50 | Male   | No_Data | No_Data | No_Data | No_Data | No_Data | No_Data | No_Data | Historical | Pre-epidemic |  | A |
| E227   | 10.03.2020 | 32,71 | 29,76  | 4,47   | 139,98 | 968,05  | 249,88 | 64 | Male   | No_Data | No_Data | No_Data | No_Data | No_Data | No_Data | No_Data | Historical | Pre-epidemic |  | A |

**Table S2. Statistics for serum levels of specific antibodies targeting SARS-CoV-2 structural proteins N, S (S1 domain), and E, in patients with confirmed SARS-CoV-2 infection (COVID), Healthy Volunteers – blood donors without confirmed SARS-CoV-2 infection (Healthy), serum samples collected from healthy volunteers in the years 2010-2017 (Historical). Presented values are normalized ELISA units, and column ‘Age’ gives the values in years; N – number of samples analyzed in the group (according to data availability), Min – the lowest value in the group, Max – the highest value in the group, 1stQu – the first quartile cutoff, 3rdQu – the third quartile cutoff, Median – median value in the group, Mean – mean value in the group.**

|                   |        | Anti-N IgG | Anti-N IgA | Anti-S1 IgG | Anti-S1 IgA | Anti-E IgG | Anti-E IgA | Age   |
|-------------------|--------|------------|------------|-------------|-------------|------------|------------|-------|
| <b>COVID</b>      | Min    | 14.02      | 17.61      | 31.78       | 69.25       | 137        | 55.47      | 23    |
|                   | 1stQu  | 41.59      | 43.86      | 113.08      | 120.46      | 255.2      | 148.43     | 33    |
|                   | Median | 78.27      | 70.93      | 390.02      | 182.47      | 516        | 197.23     | 48    |
|                   | Mean   | 257.97     | 175.56     | 451.82      | 288.88      | 645.4      | 379.54     | 47.89 |
|                   | 3rd Qu | 299.07     | 117.81     | 614.6       | 317.78      | 1000       | 633.18     | 56.5  |
|                   | Max    | 1028.04    | 1181.55    | 1932.47     | 1004.67     | 1692.9     | 1031.48    | 85    |
|                   | N      | 29         | 27         | 28          | 29          | 29         | 29         | 27    |
| <b>Healthy</b>    | Min    | 7.009      | 5.704      | 1.49        | 36.35       | 1.936      | 21.99      | 19    |
|                   | 1stQu  | 18.692     | 25.422     | 84.91       | 105.6       | 182.72     | 112.69     | 33    |
|                   | Median | 24.533     | 42.659     | 186.69      | 152.75      | 347.209    | 189.91     | 43    |
|                   | Mean   | 28.111     | 57.992     | 253.51      | 197.2       | 417.202    | 255.33     | 42.88 |
|                   | 3rd Qu | 31.25      | 63.74      | 349.8       | 223.35      | 590.513    | 313.84     | 51    |
|                   | Max    | 168.224    | 667.411    | 1098.31     | 1404.72     | 1417.231   | 1402.8     | 76    |
|                   | N      | 226        | 226        | 225         | 225         | 209        | 223        | 206   |
| <b>Historical</b> | Min    | 4.673      | 4.96       | 3.972       | 13.75       | 77.44      | 2.499      | 19    |
|                   | 1stQu  | 16.355     | 17.86      | 158.639     | 81.78       | 229.91     | 74.088     | 24    |
|                   | Median | 28.037     | 30.26      | 336.147     | 152.26      | 318.73     | 139.68     | 25    |
|                   | Mean   | 32.601     | 35.79      | 400.291     | 186.61      | 419.47     | 187.133    | 26.8  |
|                   | 3rd Qu | 40.304     | 44.15      | 547.418     | 246.32      | 477.49     | 235.632    | 28    |
|                   | Max    | 228.972    | 118.55     | 1314.796    | 835.46      | 1336.88    | 1246.377   | 57    |
|                   | N      | 64         | 63         | 61          | 63          | 62         | 64         | 45    |

**Table S3. Inhibition of binding of ACE2 receptor and virus protein S, cell-free competitive ELISA kit.**

Sera were tested with SARS-CoV-2 Neutralizing Antibody Detection ELISA Kit. Sera were selected according to identified levels of SARS-CoV-2 protein-specific IgG specified in the column 'IgG antibodies status' (for details see Supplementary material: Table S1): + inhibition observed, – inhibition not observed, ? result inconclusive, positive reference – all types of IgG high and virus neutralization confirmed in cultures, negative reference – all types of IgG low and virus neutralization in cultures not observed.

|          | Inhibition of S protein-ACE2 receptor binding | SARS-CoV-2 infection                 | comments                              |
|----------|-----------------------------------------------|--------------------------------------|---------------------------------------|
| COV15    | +                                             | <b>Infection confirmed</b>           | positive reference                    |
| COV11    | +                                             | <b>Infection confirmed</b>           | positive reference                    |
| COV18    | +                                             | <b>Infection confirmed</b>           | positive reference                    |
| HIS178   | -                                             | Historical collection of sera (2017) | negative reference                    |
| 371      | -                                             | Healthy/undiagnosed                  | negative reference                    |
| COV19 A  | ?                                             | <b>Infection confirmed</b>           |                                       |
| COV19 B  | +                                             | <b>Infection confirmed</b>           | Secondly infected                     |
| COV20 A  | ?                                             | <b>Infection confirmed</b>           |                                       |
| COV20 B  | +                                             | <b>Infection confirmed</b>           | Secondly infected                     |
| COV21 A  | +                                             | <b>Infection confirmed</b>           |                                       |
| COV 21 B | +                                             | <b>Infection confirmed</b>           |                                       |
| COV22 A  | +                                             | <b>Infection confirmed</b>           |                                       |
| COV22 B  | +                                             | <b>Infection confirmed</b>           |                                       |
| COV23 A  | +                                             | <b>Infection confirmed</b>           |                                       |
| COV23 B  | +                                             | <b>Infection confirmed</b>           |                                       |
| COV24 A  | +                                             | <b>Infection confirmed</b>           |                                       |
| COV24 B  | +                                             | <b>Infection confirmed</b>           |                                       |
| COV25 A  | +                                             | <b>Infection confirmed</b>           |                                       |
| COV25 B  | +                                             | <b>Infection confirmed</b>           |                                       |
| COV26 B  | +                                             | <b>Infection confirmed</b>           |                                       |
| COV26 C  | +                                             | <b>Infection confirmed</b>           |                                       |
| COV26 D  | +                                             | <b>Infection confirmed</b>           |                                       |
| COV28 A  | +                                             | <b>Infection confirmed</b>           |                                       |
| COV28 B  | +                                             | <b>Infection confirmed</b>           |                                       |
| COV28 C  | +                                             | <b>Infection confirmed</b>           |                                       |
| COV29 A  | +                                             | <b>Infection confirmed</b>           |                                       |
| COV29 B  | +                                             | <b>Infection confirmed</b>           |                                       |
| COV29 C  | +                                             | <b>Infection confirmed</b>           |                                       |
| 395 A    | ?                                             | Healthy/undiagnosed                  | Undiagnosed infection highly probable |
| 395 B    | ?                                             | Healthy/undiagnosed                  | Undiagnosed infection highly probable |
| 396 B    | +                                             | Healthy/undiagnosed                  | Undiagnosed infection highly probable |
| 396 B    | +                                             | Healthy/undiagnosed                  | Undiagnosed infection highly probable |
| 248A     | ?                                             | Healthy/undiagnosed                  | Undiagnosed infection highly probable |
| 248C     | ?                                             | Healthy/undiagnosed                  | Undiagnosed infection highly probable |

|        |   |                       |  |
|--------|---|-----------------------|--|
| HIS3   | - | Historical collection |  |
| HIS8   | - | Historical collection |  |
| HIS12  | - | Historical collection |  |
| HIS13  | - | Historical collection |  |
| HIS14  | - | Historical collection |  |
| HIS16  | - | Historical collection |  |
| HIS17  | - | Historical collection |  |
| HIS114 | - | Historical collection |  |
| HIS119 | - | Historical collection |  |
| HIS171 | - | Historical collection |  |
| HIS175 | - | Historical collection |  |
| HIS178 | - | Historical collection |  |
| E182   | - | Pre-epidemic          |  |
| E198   | - | Pre-epidemic          |  |
| E226   | - | Pre-epidemic          |  |
